# Supplementary material for: Systematic Characterisation of Cellular Localisation and Expression Profiles of Proteins Containing MHC Ligands
Source: PLoS One. 2009 Oct 14;4(10):e7448. doi: 10.1371/journal.pone.0007448 (PMC2758592; doi:10.1371/journal.pone.0007448)
Supplement: Table S1 — Localisation analysis of proteins containing MHC class I ligands. The analysis was done using the Cytoscape plugin BINGO on proteins in the MHCI data set. The entire human protein set was used as background. GO-ID: The ID number of the GO cellular component term. p-value: p-value indicating the statistical significance of the difference between the fraction of proteins containing MHC class I ligands assigned to this GO term and the fraction of all proteins within the human protein set assigned to this GO term. corr p-value: The above p-value corrected for multiple testing by the Benjamini & Hochberg correction method. x: The number of MHC class I-containing proteins assigned to this GO term. nX: The number of proteins within the entire human protein set assigned to this GO term. N: The total number of MHC class I-containing proteins with assignments within the GO cellular component ontology. nN: The total number of proteins within the human protein set with assignments within the GO cellular component ontology. Description: Description of the GO term. (0.20 MB XLS) [file pone.0007448.s003.xls]

## Sheet: MHCI-containing proteins
GO-ID	p-value	corr p-value	x	nX	N	nN	Description	Proteins in test set
44424	4.7286e-68	2.3454e-65	944	10117	1109	16280	intracellular part	P46940|Q71UM5|Q9H2J4|P27635|O75691|P52789|Q96PP9|O75694|Q5JPE7|Q00839|Q9Y4A5|Q96GW9|Q9UKF6|Q07820|Q96SB8|Q9BYC9|P19388|Q13347|P01903|Q07812|Q13454|Q96L92|P01137|Q99439|O75478|Q9UBW8|Q99436|P40222|P01106|O75881|Q9GZL7|P27824|P63313|P51991|Q9H2M9|P14921|P19367|P07814|Q08170|P53803|P13674|P55084|P21810|Q6NT76|P53618|P61204|Q07020|P35221|Q969Q0|Q71F23|P18085|P51572|P07148|P51571|O75460|P15880|P21127|…
5622	1.2391e-62	3.073e-60	962	10636	1109	16280	intracellular	P46940|Q71UM5|Q9H2J4|P27635|O75691|P52789|Q96PP9|O75694|Q5JPE7|Q00839|Q9Y4A5|Q96GW9|Q9UKF6|Q07820|Q96SB8|Q9BYC9|P19388|Q13347|P01903|Q07812|Q13454|Q96L92|P01137|Q99439|O75478|Q9UBW8|Q99436|P40222|P01106|O75881|Q9GZL7|P27824|P63313|P51991|Q9H2M9|P14921|P19367|P07814|Q08170|P53803|P13674|P55084|P21810|Q6NT76|P53618|P61204|Q07020|P35221|Q969Q0|Q71F23|P18085|Q96BX8|P51572|P07148|P51571|O75460|P15880|…
32991	1.7799e-56	2.9427e-54	362	2374	1109	16280	macromolecular complex	P36578|Q71UM5|Q13200|O60306|O75964|Q9BVG8|P62750|P20036|P62753|P27635|O15212|Q9UKT7|Q9NTJ3|Q9H7Z6|P61769|O75691|O15498|Q09028|P28062|P49792|P49790|P62269|O75694|P62266|Q00839|P63220|P28065|P62263|P62854|P23396|P62851|O60506|Q9Y4A5|P28066|Q9NP97|P68104|P26196|Q8WVV9|Q9BZZ5|Q96JB1|Q9BYC9|P19388|P01903|Q13347|P23921|P28070|P01906|Q8TAA3|P55209|Q13454|P18206|Q92901|Q8WWY3|P35606|O60934|Q9UBW8|P10644|…
5829	3.1278e-54	3.8785e-52	196	869	1109	16280	cytosol	Q13200|P36578|P62750|P27635|P62753|O15212|P31350|P28062|Q00987|P49792|P52789|P62269|P62266|P63220|P28065|P23396|P62854|P62263|P62851|P28066|P68104|Q13347|P14635|P23921|P28070|Q07812|Q8TAA3|Q16831|Q92901|P35606|Q9NP61|Q99436|P62249|Q13094|Q9Y678|P14625|P63208|P84098|Q07352|Q6PFW1|P62241|P62244|P62834|Q13232|P35611|P42766|P00338|P83731|P19367|P62988|P06396|P62841|P14618|P50914|Q96AQ6|P26373|P53618|…
5737	8.9501e-54	8.8785e-52	692	6547	1109	16280	cytoplasm	P46940|Q71UM5|Q13200|Q9H2J4|Q7L1Q6|O75964|Q8N5H7|Q9NP81|P27635|O15212|P31350|Q9NTJ3|O15498|P28062|P52789|Q96PP9|Q13564|Q5JPE7|P63220|P28065|P28066|Q9NP97|Q01105|Q96GW9|Q8TAS1|Q9BZZ5|Q07820|Q9BYC9|O75369|P20592|Q562R1|Q9P2E5|Q13347|P01903|P14635|Q9H3K2|Q9P2E3|P28070|Q07812|P52630|Q13454|O95786|O75563|P07237|Q16831|Q96L92|P01137|Q92901|Q86WA8|Q8TAP6|Q9NP61|Q9UBW8|Q99436|P40222|P14625|P20591|P63208|…
44446	5.4232e-45	4.4832e-43	456	3726	1109	16280	intracellular organelle part	P46940|O75964|Q9NP81|Q9NTJ3|O15498|P52789|O75694|Q5JPE7|Q00839|P63220|Q9Y4A5|Q9NP97|Q96GW9|Q9BZZ5|Q9UKF6|Q07820|P19388|P14635|Q07812|Q13454|P07237|P01137|Q86WA8|Q8TAP6|Q9NP61|Q9UBW8|P14625|P63208|P84098|O75881|Q6P2Q9|P27824|P51991|P83731|P19367|Q9H3H5|Q9NY97|Q9NY93|P48201|Q08170|P53803|P13674|P55084|Q96AQ6|Q8NF37|P53618|P13196|Q07020|P31943|Q71F23|Q9H3N1|Q01780|P51572|O15260|P51571|O75460|P15880|…
44422	1.1731e-44	8.3121e-43	456	3736	1109	16280	organelle part	P46940|O75964|Q9NP81|Q9NTJ3|O15498|P52789|O75694|Q5JPE7|Q00839|P63220|Q9Y4A5|Q9NP97|Q96GW9|Q9BZZ5|Q9UKF6|Q07820|P19388|P14635|Q07812|Q13454|P07237|P01137|Q86WA8|Q8TAP6|Q9NP61|Q9UBW8|P14625|P63208|P84098|O75881|Q6P2Q9|P27824|P51991|P83731|P19367|Q9H3H5|Q9NY97|Q9NY93|P48201|Q08170|P53803|P13674|P55084|Q96AQ6|Q8NF37|P53618|P13196|Q07020|P31943|Q71F23|Q9H3N1|Q01780|P51572|O15260|P51571|O75460|P15880|…
5830	6.3381e-37	3.9296e-35	46	70	1109	16280	cytosolic ribosome	P18124|P36578|P62750|P46777|P46779|P62277|Q07020|P62753|P63173|P62280|P62249|P62899|P62424|P84098|P62269|P62266|P61247|P62241|P63220|P62244|P62263|P62854|P23396|P62851|P46782|P62701|P15880|P46783|Q02543|P05387|P05386|P42766|P49207|P05388|P39019|P62081|P83731|P08708|P62888|P61254|P62917|Q02878|P62841|P50914|P26373|Q9Y3U8
43226	2.2388e-35	1.2338e-33	768	8392	1109	16280	organelle	P46940|Q71UM5|O75964|Q9NP81|P27635|Q9NTJ3|O75691|O15498|P28062|P52789|O75694|Q5JPE7|Q00839|P63220|P28065|Q9Y4A5|P28066|O14593|Q9NP97|Q01105|Q8TAS1|Q96GW9|Q9BZZ5|Q9UKF6|Q07820|Q96SB8|P20592|O75369|Q9BYC9|Q562R1|P19388|Q9P2E5|P14635|P01903|Q9P2E3|Q9H3K2|P28070|P52630|Q07812|Q13454|P07237|Q13207|Q96L92|P01137|Q99439|Q92901|O75478|Q86WA8|Q8TAP6|Q9NP61|Q9UBW8|Q99436|P14625|P24522|P63208|Q07352|P84098|…
43229	4.0599e-35	2.0137e-33	767	8388	1109	16280	intracellular organelle	P46940|Q71UM5|O75964|Q9NP81|P27635|Q9NTJ3|O75691|O15498|P28062|P52789|O75694|Q5JPE7|Q00839|P63220|P28065|Q9Y4A5|P28066|O14593|Q9NP97|Q01105|Q8TAS1|Q96GW9|Q9BZZ5|Q9UKF6|Q07820|Q96SB8|P20592|O75369|Q9BYC9|Q562R1|P19388|Q9P2E5|P14635|P01903|Q9P2E3|Q9H3K2|P28070|P52630|Q07812|Q13454|P07237|Q13207|Q96L92|P01137|Q99439|Q92901|O75478|Q86WA8|Q8TAP6|Q9NP61|Q9UBW8|Q99436|P14625|P24522|P63208|Q07352|P84098|…
44444	1.1245e-33	5.0705e-32	451	4035	1109	16280	cytoplasmic part	Q71UM5|Q13200|O75964|Q9NP81|P27635|O15212|P31350|O15498|P28062|P52789|Q5JPE7|P63220|P28065|P28066|Q01105|Q96GW9|Q07820|Q9BYC9|Q9P2E5|Q13347|P01903|P14635|Q9H3K2|P28070|Q07812|Q13454|P07237|Q16831|Q96L92|P01137|Q92901|Q86WA8|Q8TAP6|Q9NP61|Q99436|P14625|P63208|P84098|Q07352|Q6PFW1|O75881|Q13794|P27824|Q13232|Q99541|P83731|P19367|Q9H3H5|Q9NY97|P48201|P13674|P55084|P21810|P14618|Q96AQ6|Q8NF37|P53618|…
44445	2.8949e-33	1.1966e-31	57	126	1109	16280	cytosolic part	P36578|P62750|Q07020|P62277|P62753|O15212|Q02153|P62280|P27986|P62899|P62424|P62269|P61247|P62266|P63220|P23396|P62854|P62263|P62851|Q02108|P15880|P69905|Q02543|P78371|P49207|P39019|P69892|P61254|P62917|Q02878|O00459|P18124|P46777|P46779|P68871|Q99832|P63173|P62249|P84098|P48643|P62241|P62244|P46782|P62701|P46783|P05387|P05386|P42766|P05388|P83731|P62081|P08708|P62888|P62841|P50914|Q9Y3U8|P26373
43234	1.5061e-29	5.7464e-28	240	1711	1109	16280	protein complex	Q13200|O75964|Q9BVG8|P20036|O15212|Q9NTJ3|Q9UKT7|Q9H7Z6|P61769|O15498|Q09028|P28062|P49792|O75694|P49790|P28065|Q9Y4A5|P28066|P68104|Q9NP97|Q96JB1|P19388|P01903|Q13347|P23921|P01906|P28070|P55209|Q8TAA3|Q13454|P18206|P35606|O60934|Q9UBW8|P10644|Q99436|Q99661|Q9Y678|P06756|Q9UP83|O95139|Q5SRE5|Q7Z460|Q99650|P48201|P53618|P60228|O43242|Q9UBL3|P40306|P30153|Q71F23|Q8TEM1|Q01780|P05023|P51571|P05026|…
44428	7.5655e-29	2.6803e-27	182	1140	1109	16280	nuclear part	Q16531|P24385|P23193|Q01082|P78549|O60306|Q9BVP2|Q99814|O00571|P09601|P23528|Q9BSV6|P35249|Q96PK6|Q09028|Q00987|P49792|P49790|O75694|O75419|Q9NV31|Q00839|P61978|O60506|Q9Y4A5|P61968|Q02880|Q13151|Q15014|P22626|P39019|Q9BZZ5|P17844|Q9UKF6|P20248|P19388|P14635|Q9NVC6|P55795|P11940|O00299|O60216|P55209|Q08945|P06276|P63241|Q9GZR2|Q8WWY3|P11388|P12956|P11387|O60934|P62308|P09874|P35222|Q9UBW8|Q9Y253|…
30529	2.3258e-27	7.6908e-26	118	588	1109	16280	ribonucleoprotein complex	Q71UM5|P36578|O60306|P62750|P27635|P62753|P08865|Q96PK6|O75691|P62269|P62266|P61247|Q9NV31|Q00839|P61978|P63220|P61313|P62263|P62854|P23396|P62851|O60506|Q13151|P26196|P22626|P49207|Q8WVV9|Q9BZZ5|P39019|P17844|Q9BYC9|P55795|P11940|P61254|Q02878|Q92879|Q92901|Q8WWY3|P62308|P63173|P62304|P62249|Q7KZF4|Q8TD47|P84098|P62906|P62241|Q6P2Q9|P62244|Q9UHB9|P62701|P05387|P05386|P42766|P51991|P05388|P83731|…
33279	3.6526e-25	1.1323e-23	50	131	1109	16280	ribosomal subunit	P36578|P62750|Q07020|P62277|P62753|P08865|P62280|P62899|P18621|P62424|P62269|P61247|P62266|P63220|P23396|P62854|P62263|P62851|P15880|Q02543|P49207|P39019|P61254|P62917|Q02878|Q9Y291|P18124|P46777|P46779|Q9Y2R5|P63173|P62249|P84098|P62241|P62244|P46782|P62701|P46783|P05387|P05386|P42766|P05388|P83731|P62081|P08708|P62888|P62841|P50914|P40429|Q9Y3U8
43231	2.0299e-23	5.6338e-22	654	7263	1109	16280	intracellular membrane-bounded organelle	O75964|Q9NP81|P27635|Q9NTJ3|O75691|O15498|P28062|P52789|O75694|Q5JPE7|Q00839|P28065|Q9Y4A5|P28066|O14593|Q01105|Q96GW9|Q8TAS1|Q9BZZ5|Q9UKF6|Q07820|Q96SB8|Q9BYC9|P20592|P19388|Q9P2E5|P01903|P14635|Q9H3K2|Q9P2E3|P28070|Q07812|P52630|Q13454|Q13207|P07237|Q96L92|P01137|O75478|Q86WA8|Q9NP61|Q9UBW8|Q99436|P24522|P14625|P63208|Q07352|P01106|O75881|Q6P2Q9|Q13794|Q9GZL7|P27824|P51991|Q99541|P14921|Q9BQ70|…
43227	2.2116e-23	5.6338e-22	654	7265	1109	16280	membrane-bounded organelle	O75964|Q9NP81|P27635|Q9NTJ3|O75691|O15498|P28062|P52789|O75694|Q5JPE7|Q00839|P28065|Q9Y4A5|P28066|O14593|Q01105|Q96GW9|Q8TAS1|Q9BZZ5|Q9UKF6|Q07820|Q96SB8|Q9BYC9|P20592|P19388|Q9P2E5|P01903|P14635|Q9H3K2|Q9P2E3|P28070|Q07812|P52630|Q13454|Q13207|P07237|Q96L92|P01137|O75478|Q86WA8|Q9NP61|Q9UBW8|Q99436|P24522|P14625|P63208|Q07352|P01106|O75881|Q6P2Q9|Q13794|Q9GZL7|P27824|P51991|Q99541|P14921|Q9BQ70|…
43228	2.2717e-23	5.6338e-22	244	1929	1109	16280	non-membrane-bounded organelle	P46940|P17275|P36578|Q71UM5|P62750|Q9BVG8|P27635|P62753|P23528|Q9NTJ3|Q9H7Z6|O43491|Q9Y696|Q00987|P62269|P62266|P63220|P62263|P62854|P23396|P62851|Q9NP97|Q8WUW1|Q96SB8|Q96JB1|Q9BYC9|O75369|Q562R1|P14635|O60216|Q99439|Q92901|P18206|P26358|O75478|Q8TAP6|O60934|P09874|Q99661|P62249|P84098|P62241|P62244|P63313|P35611|P42766|Q9UNS1|P83731|Q7Z460|Q9NY93|P06396|P62841|P68133|P50914|Q96AQ6|P26373|P05783|…
43232	2.2717e-23	5.6338e-22	244	1929	1109	16280	intracellular non-membrane-bounded organelle	P46940|P17275|P36578|Q71UM5|P62750|Q9BVG8|P27635|P62753|P23528|Q9NTJ3|Q9H7Z6|O43491|Q9Y696|Q00987|P62269|P62266|P63220|P62263|P62854|P23396|P62851|Q9NP97|Q8WUW1|Q96SB8|Q96JB1|Q9BYC9|O75369|Q562R1|P14635|O60216|Q99439|Q92901|P18206|P26358|O75478|Q8TAP6|O60934|P09874|Q99661|P62249|P84098|P62241|P62244|P63313|P35611|P42766|Q9UNS1|P83731|Q7Z460|Q9NY93|P06396|P62841|P68133|P50914|Q96AQ6|P26373|P05783|…
43233	4.6305e-22	1.044e-20	167	1144	1109	16280	organelle lumen	Q16531|P24385|P23193|Q01082|P78549|Q9BVP2|Q99814|O00571|Q9NP81|P09601|P23528|P35249|Q96PK6|P54819|Q09028|Q00987|P49790|O75419|Q9NV31|P61978|Q9Y4A5|P61968|Q02880|Q15014|Q96GW9|P39019|Q15293|Q9UKF6|P20248|P19388|Q9NVC6|P14635|P55209|Q08945|P07237|O60313|P06276|P01137|Q9GZR2|Q8WWY3|P11388|P12956|P11387|O14925|O60934|P62308|P09874|P35222|Q9Y253|P62304|P30876|P35232|P14625|P50995|P63208|Q16647|P11021|…
31974	4.6305e-22	1.044e-20	167	1144	1109	16280	membrane-enclosed lumen	Q16531|P24385|P23193|Q01082|P78549|Q9BVP2|Q99814|O00571|Q9NP81|P09601|P23528|P35249|Q96PK6|P54819|Q09028|Q00987|P49790|O75419|Q9NV31|P61978|Q9Y4A5|P61968|Q02880|Q15014|Q96GW9|P39019|Q15293|Q9UKF6|P20248|P19388|Q9NVC6|P14635|P55209|Q08945|P07237|O60313|P06276|P01137|Q9GZR2|Q8WWY3|P11388|P12956|P11387|O14925|O60934|P62308|P09874|P35222|Q9Y253|P62304|P30876|P35232|P14625|P50995|P63208|Q16647|P11021|…
31981	5.7042e-22	1.2301e-20	132	804	1109	16280	nuclear lumen	Q16531|P24385|P23193|Q01082|P78549|Q9BVP2|Q99814|O00571|P09601|P23528|P35249|Q96PK6|Q09028|Q00987|P49790|O75419|Q9NV31|P61978|Q9Y4A5|P61968|Q02880|Q15014|P39019|Q9UKF6|P20248|P19388|Q9NVC6|P14635|P55209|Q08945|Q9GZR2|Q8WWY3|P11388|P12956|P11387|O60934|P62308|P09874|P35222|Q9Y253|P62304|P30876|P35232|P63208|P50995|P63272|P49736|P23497|Q6P2Q9|Q9UHB9|Q13115|Q9GZS1|P42766|Q16665|O60264|Q9Y262|Q14653|…
30498	4.4633e-20	9.2241e-19	24	36	1109	16280	cytosolic large ribosomal subunit	P18124|P36578|Q02543|P05387|P05386|P62750|P46777|P42766|P49207|P05388|P46779|Q07020|P83731|P63173|P62280|P62899|P62888|P61254|P62424|P62917|P84098|Q02878|P50914|Q9Y3U8
30873	5.8875e-19	1.1681e-17	22	32	1109	16280	cytosolic small ribosomal subunit	P15880|P46783|P39019|P62081|P62277|P62753|P62280|P08708|P62249|P62269|P61247|P62266|P62241|P62841|P63220|P62244|P23396|P62854|P62263|P62851|P46782|P62701
5654	7.6108e-17	1.4519e-15	105	655	1109	16280	nucleoplasm	Q16531|P23193|P24385|P78549|Q99814|O00571|P35249|Q96PK6|Q09028|Q00987|O75419|P49790|P61978|Q9Y4A5|P61968|Q02880|Q9UKF6|P20248|P19388|Q9NVC6|P14635|P55209|Q08945|Q8WWY3|P11388|P12956|P11387|O60934|P62308|P35222|Q9Y253|P62304|P30876|P35232|P63208|P50995|P63272|P49736|P23497|Q6P2Q9|Q13115|Q16665|O60264|Q9Y262|Q14653|P62988|P53803|Q08170|O94776|O75400|Q9Y2Y1|O94913|Q9UBL3|Q92769|Q12874|Q9UBB9|Q16666|…
5634	1.9426e-16	3.5687e-15	442	4691	1109	16280	nucleus	Q9NTJ3|O75691|P28062|O75694|Q00839|P28065|Q9Y4A5|P28066|O14593|Q01105|Q8TAS1|Q9BZZ5|Q9UKF6|Q07820|Q96SB8|P20592|P19388|P14635|Q9P2E3|P28070|P52630|Q13207|O75478|Q9UBW8|Q99436|P24522|P63208|Q07352|P01106|Q6P2Q9|Q9GZL7|P51991|P14921|Q9BQ70|Q9NY93|Q08170|P53803|Q6NT76|Q96AQ6|P40763|P40306|P31943|Q71F23|Q9NRF9|Q01780|P57086|P21127|P18583|P21333|Q9Y5B9|Q8ND90|Q96PU8|P41162|P19338|P04792|P25788|O75179|…
5840	1.3614e-15	2.4117e-14	68	347	1109	16280	ribosome	Q71UM5|P36578|P62750|Q07020|P62277|P62753|P27635|P08865|P61353|Q969Q0|P32969|P62280|P18621|P62899|P62424|P62269|P62266|P61247|P63220|P61313|P62263|P62854|P23396|P62851|P15880|Q02543|P49207|P39019|Q9BYC9|P61254|P62917|Q02878|Q9Y291|P18124|Q92901|P23443|P46777|P46779|Q9Y2R5|P63173|P62249|Q8TD47|P84098|P62906|P62241|Q15637|P62244|Q9UHB9|P46782|Q13405|P62701|P46783|P05387|P05386|P42766|P05388|P62081|…
44464	1.1783e-14	2.0154e-13	1073	14833	1109	16280	cell part	P46940|Q71UM5|Q9H2J4|P27635|O75691|P52789|Q96PP9|O75694|Q5JPE7|Q00839|Q9Y4A5|Q96GW9|Q9UKF6|Q07820|Q96SB8|Q9BYC9|P19388|Q13347|P01903|P01906|Q07812|Q13454|Q96L92|P01137|Q8IZF2|Q99439|Q6TCH4|O75478|Q9UBW8|Q99436|P40222|P06756|P01106|Q9Y6G1|O75881|Q9GZL7|P27824|P63313|P51991|Q9H2M9|P14921|P19367|P07814|Q08170|P53803|P13674|P55084|P21810|Q6NT76|P53618|P61204|Q8N6L1|Q07020|P35221|Q969Q0|Q71F23|P18085|…
5623	1.2391e-14	2.0486e-13	1073	14834	1109	16280	cell	P46940|Q71UM5|Q9H2J4|P27635|O75691|P52789|Q96PP9|O75694|Q5JPE7|Q00839|Q9Y4A5|Q96GW9|Q9UKF6|Q07820|Q96SB8|Q9BYC9|P19388|Q13347|P01903|P01906|Q07812|Q13454|Q96L92|P01137|Q8IZF2|Q99439|Q6TCH4|O75478|Q9UBW8|Q99436|P40222|P06756|P01106|Q9Y6G1|O75881|Q9GZL7|P27824|P63313|P51991|Q9H2M9|P14921|P19367|P07814|Q08170|P53803|P13674|P55084|P21810|Q6NT76|P53618|P61204|Q8N6L1|Q07020|P35221|Q969Q0|Q71F23|P18085|…
502	5.0303e-14	8.0485e-13	22	47	1109	16280	proteasome complex	P48556|Q9UL46|P25788|O43242|Q13200|P40306|P25787|Q99436|P62195|O00487|P20618|Q16186|P61289|P28062|P28070|Q8TAA3|Q9UNM6|P49721|P28065|P49720|P62191|P28066
15934	6.2771e-14	9.7295e-13	26	67	1109	16280	large ribosomal subunit	P36578|P18124|P46777|P62750|P46779|Q07020|P63173|P62280|P62899|P18621|P62424|P84098|Q02543|P05387|P05386|P49207|P42766|P05388|P83731|P62888|P61254|P62917|Q02878|P50914|Q9Y3U8|P40429
15935	3.6607e-13	5.5022e-12	25	66	1109	16280	small ribosomal subunit	Q9Y291|P62277|P62753|Q9Y2R5|P08865|P62280|P62249|P62269|P62266|P61247|P62241|P62244|P63220|P62263|P62854|P23396|P46782|P62851|P62701|P15880|P46783|P39019|P62081|P08708|P62841
5681	7.9688e-12	1.1625e-10	34	132	1109	16280	spliceosome	Q8WWY3|O60306|Q12874|Q9UBB9|Q15029|P62308|P31943|P62304|Q15427|Q92620|Q15382|Q6P2Q9|P38919|Q15637|P61978|Q00839|P09651|O60506|Q9HCS7|P52272|O94906|O75643|P22626|P51991|Q9BZZ5|P17844|Q13838|P11940|P07910|P62316|Q9UNY4|Q9Y6Y0|Q9Y5S9|Q15393
5730	2.7237e-11	3.8599e-10	36	152	1109	16280	nucleolus	Q9GZR2|Q01082|Q9BVP2|P11387|O60563|Q06330|P09601|P09874|O60832|Q9UNX4|Q08211|Q00987|Q9NV31|Q01780|Q5C9Z4|Q16666|Q9UHB9|Q9GZS1|Q9NR30|Q15014|P61011|P42766|Q9Y2X3|P39019|P62081|Q9BYG3|Q9Y262|P24928|Q8ND90|P22087|P04637|Q9NY93|Q9H0S4|P19338|Q9Y3U8|P29590
48770	1.2279e-10	1.6461e-09	25	83	1109	16280	pigment granule	P07355|P40967|P31946|P14679|P08133|P11142|Q7KZF4|P14625|P50995|Q00610|P05023|P30101|P27824|P49755|P35613|P49327|O00560|P51149|P21281|Q14697|P08238|P55209|P09543|P07237|Q14956
42470	1.2279e-10	1.6461e-09	25	83	1109	16280	melanosome	P07355|P40967|P31946|P14679|P08133|P11142|Q7KZF4|P14625|P50995|Q00610|P05023|P30101|P27824|P49755|P35613|P49327|O00560|P51149|P21281|Q14697|P08238|P55209|P09543|P07237|Q14956
5783	8.7917e-10	1.1475e-08	104	833	1109	16280	endoplasmic reticulum	P27635|P09601|Q9H3S5|O15498|Q969N2|P08034|Q5JPE7|O60506|Q15011|P10619|Q01105|O15121|Q15293|O00560|Q8IWX8|Q13454|P07237|O00767|Q15005|Q86YR5|P06276|O60488|P62633|Q14643|P33121|O43826|P14625|Q16647|P53992|P11021|O95433|O75881|O00165|Q14257|Q9UHB9|Q15800|Q70SY1|P30101|P27824|P35610|Q99541|P50454|Q9H3H5|O15533|P18031|P61803|P13674|Q9H9S3|Q96AY3|Q8NF37|Q9BUN8|P55061|Q9BX93|Q9BVK6|P39656|Q8TEL6|Q9NYP7|…
5839	1.558e-09	1.9814e-08	12	21	1109	16280	proteasome core complex	P20618|P25788|P28062|P28070|Q8TAA3|P40306|P25787|P49721|P28065|P49720|P28066|Q99436
44432	5.7642e-09	7.1475e-08	78	582	1109	16280	endoplasmic reticulum part	Q9BUN8|Q9BVK6|P39656|Q9H3S5|Q8TEL6|Q9NYP7|Q9BY50|P49458|Q8TEM1|Q969N2|Q9H3N1|P08034|P51572|O15260|P23219|Q5JPE7|P51571|P04844|O75460|Q15011|O15121|Q9Y282|Q15293|O00560|Q9H0U3|P61619|Q15392|Q13454|Q15629|P07237|Q8TCT9|Q16678|O00767|Q15005|Q86YR5|Q9Y3B3|O60488|O15503|Q9UM00|P27797|O95573|O43826|Q14643|P33121|P14625|Q96DZ1|Q16647|P53992|P11021|O75881|Q14257|P37268|Q70SY1|Q15800|P30101|P35610|P27824|…
42175	3.4408e-07	4.1626e-06	68	532	1109	16280	nuclear envelope-endoplasmic reticulum network	Q9BUN8|Q9BVK6|P39656|Q9H3S5|Q9NYP7|Q9BY50|P49458|Q8TEM1|Q8NF91|Q969N2|Q9H3N1|P08034|P51572|O15260|Q5JPE7|P23219|P04844|P51571|O75460|Q15011|O15121|Q9Y282|O00560|Q9H0U3|P61619|Q15392|Q13454|Q15629|Q8TCT9|Q16678|O00767|Q15005|Q86YR5|Q9Y3B3|O60488|P63241|O15503|Q9UM00|O95573|O43826|Q14643|P33121|P14625|Q16647|P53992|O75881|P37268|Q15800|Q70SY1|P35610|P27824|P43307|Q9Y5Y5|O75340|P43308|Q9H3H5|O15533|…
5938	4.2404e-07	5.0077e-06	18	68	1109	16280	cell cortex	Q01082|Q15019|Q8WYJ6|P11171|O60759|P35579|Q14141|O43491|Q13813|P35580|Q7Z460|P15311|Q9NRC6|P29966|Q15691|P62330|O43707|P19338
5789	1.2013e-06	1.3857e-05	65	518	1109	16280	endoplasmic reticulum membrane	Q9BUN8|Q9BVK6|P39656|Q9H3S5|Q9NYP7|Q9BY50|P49458|Q8TEM1|Q969N2|Q9H3N1|P08034|P51572|O15260|Q5JPE7|P23219|P04844|P51571|O75460|Q15011|O15121|Q9Y282|O00560|Q9H0U3|P61619|Q15392|Q13454|Q15629|Q8TCT9|Q16678|O00767|Q15005|Q9Y3B3|Q86YR5|O60488|O15503|Q9UM00|O95573|O43826|Q14643|P33121|P14625|Q16647|P53992|O75881|P37268|Q15800|Q70SY1|P27824|P35610|P43307|Q9Y5Y5|O75340|P43308|Q9H3H5|O15533|P18031|Q15437|…
15629	1.2737e-06	1.4358e-05	35	215	1109	16280	actin cytoskeleton	P46940|Q01082|P18206|Q9UHD8|P35221|P11171|O43491|Q9Y2H1|P15311|P61160|Q12965|Q9Y696|P29966|O94768|O00165|O43707|O95166|Q96AC1|O15144|P60660|P21333|O75369|P35579|Q13813|P35580|Q9UKI2|O60229|Q9NRC6|P06396|Q7Z406|P47756|Q16658|P68133|P61158|P26232
31090	3.5234e-06	3.8836e-05	148	1518	1109	16280	organelle membrane	O75964|Q9H3S5|O00483|P61769|O15498|P54819|P49792|Q969N2|P52789|P49790|O75694|P08034|Q5JPE7|Q15011|O15121|Q07820|O00560|Q9NZJ7|O00299|Q07812|Q13454|O60313|O00767|Q15005|Q86YR5|O60488|P63241|O14925|P09669|P35606|P04040|Q9NP61|O43826|P33121|Q14643|P15954|P35232|Q9Y678|P14625|Q9H2D1|Q16647|Q15904|P53992|Q00610|O00165|O75881|P00403|Q15800|Q70SY1|P35610|P27824|Q9UP83|P35613|O95139|Q96AG3|P19367|Q9H3H5|…
5852	3.9049e-06	4.2105e-05	7	12	1109	16280	eukaryotic translation initiation factor 3 complex	P60228|Q13347|O75822|O15372|O15371|Q99613|P55884
31975	1.0718e-05	0.00011075	66	564	1109	16280	envelope	Q9Y2Y0|O14949|O75964|O00483|O95168|P54819|Q92621|Q8TEM1|Q8NF91|P49792|P52789|P49790|O75694|O95167|P52294|Q8WUM0|Q9P0J0|Q07820|Q9NZJ7|O95298|O00299|Q07812|P10809|Q00325|O60313|Q9BUP0|P06276|O60488|P63241|O15239|O14925|P09669|O95573|P09874|P33121|Q9UG63|P15954|O95373|P35232|Q9H2D1|P50995|P45973|P52292|Q14739|O00165|P00403|P12004|Q16891|P14854|P20674|O95139|Q96AG3|O75340|Q9Y5L4|O00505|P19367|Q16611|…
31967	1.0718e-05	0.00011075	66	564	1109	16280	organelle envelope	Q9Y2Y0|O14949|O75964|O00483|O95168|P54819|Q92621|Q8TEM1|Q8NF91|P49792|P52789|P49790|O75694|O95167|P52294|Q8WUM0|Q9P0J0|Q07820|Q9NZJ7|O95298|O00299|Q07812|P10809|Q00325|O60313|Q9BUP0|P06276|O60488|P63241|O15239|O14925|P09669|O95573|P09874|P33121|Q9UG63|P15954|O95373|P35232|Q9H2D1|P50995|P45973|P52292|Q14739|O00165|P00403|P12004|Q16891|P14854|P20674|O95139|Q96AG3|O75340|Q9Y5L4|O00505|P19367|Q16611|…
44448	1.2968e-05	0.00013127	13	48	1109	16280	cell cortex part	Q01082|Q15019|Q8WYJ6|P11171|P35579|O43491|Q13813|Q14141|Q7Z460|Q9NRC6|P15311|Q15691|O43707
5694	1.3645e-05	0.00013535	49	382	1109	16280	chromosome	P17275|Q92769|Q96A08|P35249|Q9NTJ3|Q9H7Z6|Q71F23|Q02880|Q8WUM0|P30622|P63146|Q5VTR2|Q9BYG3|Q96SB8|Q9Y5B9|P15927|Q15021|P05412|Q08945|O60216|P16402|O00255|O14646|P26358|O75478|O60934|Q71DI3|O60566|P84243|Q99661|P45973|Q5UIP0|P29374|P49736|P23497|P12004|Q96QV6|P62805|P16104|O43684|O43683|O14777|Q9UNS1|O60264|P25205|P33993|Q7Z460|Q9NRZ9|P09429
30863	1.5692e-05	0.00015261	9	24	1109	16280	cortical cytoskeleton	Q7Z460|Q01082|P15311|Q9NRC6|Q15691|O43707|P11171|Q13813|O43491
12505	4.3422e-05	0.00041418	110	1115	1109	16280	endomembrane system	Q9H3S5|P61769|O15498|Q969N2|P49792|O75694|P49790|P08034|Q5JPE7|Q15011|O15121|O00560|O00299|Q13454|O00767|Q15005|Q86YR5|P06276|O60488|P63241|P35606|Q9NP61|O43826|Q14643|P33121|P09874|Q02223|P14625|Q9Y678|P50995|Q16647|P60763|P53992|Q00610|O00165|O75881|Q15800|Q70SY1|P27824|P35610|Q9UP83|P35613|Q9H3H5|O15533|P18031|Q9NY97|Q5SRE5|P61803|Q9H9S3|Q8NF37|P53618|Q9BUN8|Q9BVK6|P39656|Q9NYP7|P14679|Q9BY50|…
30117	4.669e-05	0.00042885	14	61	1109	16280	membrane coat	P35606|Q9Y6Q5|P63010|Q15437|Q15436|Q9Y678|P53677|P61923|P53992|Q00610|Q10567|Q96CW1|O14579|P53618
48475	4.669e-05	0.00042885	14	61	1109	16280	coated membrane	P35606|Q9Y6Q5|P63010|Q15437|Q15436|Q9Y678|P53677|P61923|P53992|Q00610|Q10567|Q96CW1|O14579|P53618
8250	6.8428e-05	0.0006171	5	8	1109	16280	oligosaccharyl transferase complex	P61803|Q13454|P39656|Q9H0U3|P04844
30530	7.0804e-05	0.00062712	7	17	1109	16280	heterogeneous nuclear ribonucleoprotein complex	P55795|Q13151|P22626|P31943|P61978|Q00839|P09651
32432	0.00011155	0.00095391	6	13	1109	16280	actin filament bundle	P35580|Q9UHD8|P68133|O43707|P35579|Q96AC1
1725	0.00011155	0.00095391	6	13	1109	16280	stress fiber	P35580|Q9UHD8|P68133|O43707|P35579|Q96AC1
8091	0.0001453	0.0012215	5	9	1109	16280	spectrin	Q01082|Q9NRC6|P11171|Q13813|O43491
44451	0.00016827	0.0013911	46	388	1109	16280	nucleoplasm part	Q9Y2Y1|Q9UBL3|O94913|Q86XP3|Q8WWY3|Q9Y294|Q12874|Q92769|Q9UBB9|P12956|Q99814|O00571|P29083|P35222|Q93074|Q96PK6|P30876|P62875|Q09028|P15884|Q6IA86|Q6P2Q9|P23497|Q86U44|Q9Y4A5|Q96T76|P61968|P18583|P61011|Q16665|O60264|P19388|P24928|P33993|Q9NVC6|P05412|P18074|Q08170|P55209|Q9UNY4|Q9Y6Y0|O94776|O75400|Q13627|O00255|P29590
44427	0.00020125	0.0016364	40	325	1109	16280	chromosomal part	P17275|P26358|Q92769|Q96A08|O60934|Q71DI3|P35249|O60566|Q9NTJ3|Q9H7Z6|Q99661|Q71F23|P84243|P45973|P29374|Q5UIP0|P49736|P23497|P12004|Q96QV6|P62805|P16104|O43684|Q8WUM0|O43683|P30622|P63146|O14777|Q9UNS1|P15927|P25205|P33993|Q7Z460|Q15021|Q9NRZ9|Q08945|P16402|O00255|P09429|O14646
5788	0.00022564	0.0018051	14	70	1109	16280	endoplasmic reticulum lumen	P30101|P27797|Q15293|Q8TEL6|P50454|P14625|P13674|Q96DZ1|Q9UNW1|Q16647|P07237|Q96AY3|P11021|Q14257
32154	0.00031531	0.0024824	3	3	1109	16280	cleavage furrow	P35580|O00255|P35579
30660	0.00033885	0.0026261	9	34	1109	16280	Golgi-associated vesicle membrane	Q15437|Q15436|Q9Y678|P61923|P35606|P53992|Q00610|O14579|P53618
5657	0.00041106	0.0031367	8	28	1109	16280	replication fork	P33993|P26358|Q92769|P35249|P12004|P15927|P25205|P16104
5856	0.00042795	0.0031749	104	1106	1109	16280	cytoskeleton	P46940|Q01082|Q9UHD8|Q9BVG8|Q14289|P23528|O43491|Q14141|Q9Y696|O43707|Q9NP97|Q9NYC9|P04083|Q9Y490|Q8WUW1|O00560|Q96JB1|O75369|Q562R1|P14635|Q9H0H5|P02545|Q86UX7|Q99439|P18206|Q8TAP6|Q15121|P35222|Q9NVX0|Q99661|Q96BJ8|O94768|O00165|Q13509|O15144|P63313|P35611|Q7Z460|P06396|Q16658|Q15691|P68133|Q96AQ6|Q96DT5|P26232|Q13045|Q9Y2Y0|P05783|Q9UJZ1|P30153|P35221|P11171|Q96RU3|P68371|Q9Y2H1|P15311|Q08211|…
30120	0.00042887	0.0031749	9	35	1109	16280	vesicle coat	Q15437|Q15436|Q9Y678|P61923|P35606|P53992|Q00610|O14579|P53618
30663	0.00047468	0.0033635	5	11	1109	16280	COPI coated vesicle membrane	Q9Y678|P61923|P35606|O14579|P53618
22624	0.00047468	0.0033635	5	11	1109	16280	proteasome accessory complex	P48556|Q9UL46|Q13200|P61289|Q9UNM6
17167	0.00047468	0.0033635	5	11	1109	16280	COPI vesicle coat	Q9Y678|P61923|P35606|O14579|P53618
5643	0.00050969	0.0035606	13	67	1109	16280	nuclear pore	P52294|Q8WUM0|O00505|Q5SRE5|O95373|Q92621|Q8TEM1|P49792|O75694|P49790|O14980|P52292|P63241
46930	0.00054776	0.0037735	14	76	1109	16280	pore complex	P52294|Q8WUM0|Q16611|O00505|Q5SRE5|O95373|Q92621|Q8TEM1|P49792|O14980|O75694|P49790|P52292|P63241
5793	0.00060804	0.0041314	10	44	1109	16280	ER-Golgi intermediate compartment	Q15437|Q9Y282|P49755|Q9BVK6|Q96AX2|P07237|P51572|O15260|P50454|P53990
44453	0.0007251	0.0048589	16	96	1109	16280	nuclear membrane part	P52294|Q8WUM0|O00505|Q5SRE5|O95373|Q92621|Q8TEM1|Q8NF91|P49792|O14980|O75694|P49790|Q14739|P52292|P43243|P63241
16469	0.00073472	0.0048589	10	45	1109	16280	proton-transporting two-sector ATPase complex	Q16864|Q9Y5K8|P48201|O75964|P25705|P27449|Q15904|Q9UI12|P21283|P21281
30532	0.00082646	0.0053937	7	24	1109	16280	small nuclear ribonucleoprotein complex	Q8WWY3|P62316|O75643|Q15393|P62308|Q6P2Q9|P62304
44438	0.00088234	0.0055492	10	46	1109	16280	microbody part	P51659|O00116|Q8WVX9|Q86WA8|O95573|P04040|Q9Y5Y5|P33121|O60488|Q96CW1
44439	0.00088234	0.0055492	10	46	1109	16280	peroxisomal part	P51659|O00116|Q8WVX9|Q86WA8|O95573|P04040|Q9Y5Y5|P33121|O60488|Q96CW1
5798	0.00088385	0.0055492	11	54	1109	16280	Golgi-associated vesicle	Q15437|Q15436|Q9Y678|P61923|P35606|P53992|O14672|Q00610|P14679|O14579|P53618
19866	0.0010821	0.0066772	34	286	1109	16280	organelle inner membrane	O14949|O15239|O75964|O14925|P09669|O00483|P15954|O95168|P54819|P35232|Q9H2D1|Q14739|P00403|O95167|Q16891|P14854|Q9P0J0|P20674|O95139|Q96AG3|Q9Y5L4|P99999|Q9NZJ7|O95298|P48201|P10809|Q00325|P55084|P07919|P25705|O60313|P43243|Q9BUP0|Q07837
31970	0.0010904	0.0066772	8	32	1109	16280	organelle envelope lumen	P99999|Q9Y2Y0|P54819|P14854|O14925|O60313|Q9Y5L4|P06276
30137	0.0011786	0.0070886	5	13	1109	16280	COPI-coated vesicle	Q9Y678|P61923|P35606|O14579|P53618
5832	0.001197	0.0070886	3	4	1109	16280	chaperonin-containing T-complex	P78371|P48643|Q99832
307	0.0012005	0.0070886	4	8	1109	16280	cyclin-dependent protein kinase holoenzyme complex	P24385|P30279|Q00534|P12004
5635	0.0012987	0.0075383	24	181	1109	16280	nuclear envelope	P52294|Q8WUM0|O75340|P09874|O00505|Q5SRE5|O95373|Q92621|O00299|Q8TEM1|Q8NF91|P49792|P50995|O14980|P49790|P45973|O75694|Q14739|P52292|O00165|P43243|P12004|P06276|P63241
5743	0.001307	0.0075383	32	267	1109	16280	mitochondrial inner membrane	O14949|O15239|O75964|O14925|P09669|O00483|P15954|O95168|P54819|P35232|Q9H2D1|P00403|O95167|Q16891|P14854|Q9P0J0|P20674|O95139|Q96AG3|Q9Y5L4|Q9NZJ7|P99999|O95298|P48201|P10809|Q00325|P55084|P07919|P25705|O60313|Q9BUP0|Q07837
16023	0.0014611	0.0083257	40	359	1109	16280	cytoplasmic membrane-bounded vesicle	P07355|P40967|P35606|P31946|P14679|P08133|Q7KZF4|P11142|P14770|O15498|Q9Y678|P14625|P50995|P53992|Q00610|P05023|O14579|P30101|P02671|P27824|P02675|P49755|P35613|P49327|O14672|O00560|P51149|P21281|Q15437|Q15436|P08238|Q14697|P09543|P55209|P61923|P07237|P21810|Q14956|P01137|P53618
5699	0.0014771	0.0083257	10	49	1109	16280	kinetochore	Q71F23|Q7Z460|O43684|Q8WUM0|O43683|P30622|O14777|P45973|O60566|Q9H7Z6
30662	0.0017614	0.0098163	9	42	1109	16280	coated vesicle membrane	Q15437|Q15436|Q9Y678|P61923|P35606|P53992|Q00610|O14579|P53618
5740	0.0018704	0.010288	42	387	1109	16280	mitochondrial envelope	Q9Y2Y0|O14949|O15239|O75964|O14925|P09669|O95573|O00483|P33121|Q9UG63|P15954|O95168|P54819|P35232|Q9H2D1|P52789|P00403|O95167|Q16891|P14854|Q9P0J0|P20674|Q07820|O95139|Q96AG3|Q9Y5L4|Q16611|P19367|P99999|Q9NZJ7|O95298|P48201|P10809|Q07812|Q00325|P07919|P55084|P25705|O60313|O60488|Q07837|Q9BUP0
31988	0.0018876	0.010288	40	364	1109	16280	membrane-bounded vesicle	P07355|P40967|P35606|P31946|P14679|P08133|Q7KZF4|P11142|P14770|O15498|Q9Y678|P14625|P50995|P53992|Q00610|P05023|O14579|P30101|P02671|P27824|P02675|P49755|P35613|P49327|O14672|O00560|P51149|P21281|Q15437|Q15436|P08238|Q14697|P09543|P55209|P61923|P07237|P21810|Q14956|P01137|P53618
44455	0.0019819	0.010685	17	115	1109	16280	mitochondrial membrane part	O14949|O15239|O75964|Q9P0J0|O14925|O95139|O00483|Q9Y5L4|P99999|O95298|O95168|P48201|P07919|P25705|O60313|P00403|O95167
16281	0.0020446	0.010905	4	9	1109	16280	eukaryotic translation initiation factor 4F complex	O43432|Q15056|Q14240|P60842
30864	0.0024524	0.01294	5	15	1109	16280	cortical actin cytoskeleton	Q01082|Q9NRC6|P11171|Q13813|O43491
31966	0.0025387	0.013255	40	370	1109	16280	mitochondrial membrane	O14949|O15239|O75964|O14925|P09669|O95573|O00483|P33121|P15954|O95168|P54819|P35232|Q9H2D1|P52789|P00403|O95167|Q16891|P14854|Q9P0J0|P20674|Q07820|O95139|Q96AG3|Q9Y5L4|Q16611|P19367|P99999|Q9NZJ7|O95298|P48201|P10809|Q07812|Q00325|P07919|P55084|P25705|O60313|O60488|Q07837|Q9BUP0
31971	0.0027634	0.014089	7	29	1109	16280	mitochondrial intermembrane space	P99999|Q9Y2Y0|P54819|P14854|O14925|O60313|Q9Y5L4
267	0.0028032	0.014089	71	749	1109	16280	cell fraction	O15427|Q16864|P07355|P13987|P55061|Q13867|P39656|Q14627|P30153|P09601|P06737|Q9BY50|Q00987|Q9Y696|Q9H3N1|P62424|Q13564|P23219|P08174|P05023|P25098|O60506|O15121|P49588|P02675|P49755|Q13813|P04637|Q16186|O00299|P07237|Q16678|O00255|Q15005|O60488|Q9Y6K5|P49585|P23443|P14868|P12956|P08581|O95573|Q96F07|P60520|Q9NZN4|P33121|P35222|Q14168|P42892|O95373|P08243|P14625|O15438|O00165|O75881|Q6NZI2|P35610|…
45120	0.0028404	0.014089	3	5	1109	16280	pronucleus	Q15021|Q5UIP0|P20248
32153	0.0028404	0.014089	3	5	1109	16280	cell division site	P35580|O00255|P35579
32155	0.0028404	0.014089	3	5	1109	16280	cell division site part	P35580|O00255|P35579
5717	0.0034855	0.017117	23	184	1109	16280	chromatin	P17275|P26358|Q92769|P63146|Q96A08|Q9UNS1|Q71DI3|Q9H7Z6|P33993|P84243|Q9NRZ9|Q08945|P16402|P45973|P29374|P49736|O00255|P23497|P09429|Q96QV6|P16104|P62805|O14646
31965	0.0041738	0.020296	19	144	1109	16280	nuclear membrane	P52294|Q8WUM0|O75340|O00505|Q5SRE5|O95373|Q92621|O00299|Q8TEM1|Q8NF91|P49792|O14980|P49790|O75694|Q14739|P52292|O00165|P43243|P63241
8074	0.0046365	0.021695	2	2	1109	16280	guanylate cyclase complex, soluble	Q02153|Q02108
30981	0.0046365	0.021695	2	2	1109	16280	cortical microtubule cytoskeleton	Q7Z460|Q15691
5642	0.0046365	0.021695	2	2	1109	16280	annulate lamellae	O14980|P63241
1940	0.0046365	0.021695	2	2	1109	16280	male pronucleus	Q5UIP0|P20248
31982	0.0048572	0.022516	46	456	1109	16280	vesicle	P07355|P40967|Q96AX2|P35606|P31946|Q9Y6Q5|Q96RU3|P14679|P08133|Q7KZF4|P11142|P14770|O15498|Q9Y696|Q9Y678|P14625|P50995|P53992|Q00610|P05023|O14579|P02671|P30101|P27824|P02675|P49755|P35613|P49327|O14672|O00560|P11597|P51149|P21281|Q15437|Q15436|P08238|Q14697|P09543|P55209|P61923|P07237|P21810|Q10567|Q14956|P01137|P53618
5853	0.0053934	0.02477	3	6	1109	16280	eukaryotic translation elongation factor 1 complex	Q05639|P68104|P26641
31410	0.0057266	0.026059	45	448	1109	16280	cytoplasmic vesicle	P07355|P40967|Q96AX2|P35606|P31946|Q9Y6Q5|Q96RU3|P14679|P08133|Q7KZF4|P11142|P14770|O15498|Q9Y696|Q9Y678|P14625|P50995|P53992|Q00610|P05023|O14579|P02671|P30101|P27824|P02675|P49755|P35613|P49327|O14672|O00560|P51149|P21281|Q15437|Q15436|P08238|Q14697|P09543|P55209|P61923|P07237|P21810|Q10567|Q14956|P01137|P53618
5746	0.0066309	0.029609	11	69	1109	16280	mitochondrial respiratory chain	P99999|O95298|O95168|O14949|O15239|Q9P0J0|P07919|P00403|O00483|O95139|O95167
31903	0.006686	0.029609	8	42	1109	16280	microbody membrane	O00116|Q8WVX9|O95573|P04040|Q9Y5Y5|P33121|O60488|Q96CW1
5778	0.006686	0.029609	8	42	1109	16280	peroxisomal membrane	O00116|Q8WVX9|O95573|P04040|Q9Y5Y5|P33121|O60488|Q96CW1
5902	0.0075608	0.033187	5	19	1109	16280	microvillus	P15311|Q9Y696|P26038|Q9Y6N9|P35222
30127	0.0089627	0.037674	3	7	1109	16280	COPII vesicle coat	Q15437|Q15436|P53992
12507	0.0089627	0.037674	3	7	1109	16280	ER to Golgi transport vesicle membrane	Q15437|Q15436|P53992
5885	0.0089627	0.037674	3	7	1109	16280	Arp2/3 protein complex	P61160|O15144|P61158
48500	0.0089627	0.037674	3	7	1109	16280	signal recognition particle	P49458|P61011|Q9UHB9
5786	0.0089627	0.037674	3	7	1109	16280	signal recognition particle, endoplasmic reticulum targeting	P49458|P61011|Q9UHB9
30175	0.0093135	0.038819	4	13	1109	16280	filopodium	P15311|P60953|Q16658|P26038
792	0.0095256	0.039372	5	20	1109	16280	heterochromatin	P84243|P26358|Q92769|Q9NRZ9|P45973
16607	0.01123	0.046032	12	84	1109	16280	nuclear speck	P18583|Q86XP3|Q8WWY3|Q12874|P61011|Q08170|Q9UBB9|O00571|O75400|Q13627|Q6P2Q9|Q86U44
5792	0.011888	0.048331	19	159	1109	16280	microsome	Q6NZI2|Q9Y6K5|P35610|P49755|P39656|O95573|P09601|P33121|Q9H3H5|O15533|Q9BY50|P14625|P07237|Q16678|P23219|O75881|Q15005|O60488|O60506
5665	0.012346	0.049386	4	14	1109	16280	DNA-directed RNA polymerase II, core complex	P30876|P62875|P19388|P24928
5858	0.012346	0.049386	4	14	1109	16280	axonemal dynein complex	Q9NYC9|Q8TD57|Q96JB1|Q96DT5
16581	0.013279	0.051456	2	3	1109	16280	NuRD complex	Q09028|O94776
421	0.013279	0.051456	2	3	1109	16280	autophagic vacuole membrane	P60520|O95166
8537	0.013279	0.051456	2	3	1109	16280	proteasome activator complex	Q9UL46|P61289
1939	0.013279	0.051456	2	3	1109	16280	female pronucleus	Q5UIP0|P20248
775	0.013426	0.051624	12	86	1109	16280	chromosome, centromeric region	Q99661|Q71F23|Q7Z460|O43684|Q8WUM0|O43683|P30622|Q9NRZ9|O14777|P45973|O60566|Q9H7Z6
5838	0.01362	0.051965	3	8	1109	16280	proteasome regulatory particle	P48556|Q13200|Q9UNM6
16323	0.015437	0.058447	13	98	1109	16280	basolateral plasma membrane	Q12864|P04083|P18206|Q9Y6R1|Q9Y490|Q14289|Q15654|P08581|Q8N307|P35222|P04626|P00533|P05026
44447	0.015944	0.059912	4	15	1109	16280	axoneme part	Q9NYC9|Q8TD57|Q96JB1|Q96DT5
42598	0.016139	0.060144	19	164	1109	16280	vesicular fraction	Q6NZI2|Q9Y6K5|P35610|P49755|P39656|O95573|P09601|P33121|Q9H3H5|O15533|Q9BY50|P14625|P07237|Q16678|P23219|O75881|Q15005|O60488|O60506
793	0.016249	0.060144	11	78	1109	16280	condensed chromosome	Q71F23|Q7Z460|Q15021|Q8WUM0|O43683|O14777|Q9BYG3|P09429|O60264|Q9NTJ3|O60566
30134	0.019408	0.069683	3	9	1109	16280	ER to Golgi transport vesicle	Q15437|Q15436|P53992
8180	0.019408	0.069683	3	9	1109	16280	signalosome	Q99627|Q7L5N1|Q9UBW8
45271	0.019571	0.069683	7	41	1109	16280	respiratory chain complex I	O95298|O95168|O15239|Q9P0J0|O00483|O95139|O95167
5747	0.019571	0.069683	7	41	1109	16280	mitochondrial respiratory chain complex I	O95298|O95168|O15239|Q9P0J0|O00483|O95139|O95167
30964	0.019571	0.069683	7	41	1109	16280	NADH dehydrogenase complex	O95298|O95168|O15239|Q9P0J0|O00483|O95139|O95167
151	0.019668	0.069683	10	70	1109	16280	ubiquitin ligase complex	O75426|P68036|Q13620|P46736|Q9UKA1|Q86XK2|Q13618|Q9UKT7|O60566|Q13356
159	0.020136	0.070833	4	16	1109	16280	protein phosphatase type 2A complex	P99999|P63151|P30153|Q14738
428	0.020842	0.072289	5	24	1109	16280	DNA-directed RNA polymerase complex	Q9Y2Y1|P30876|P62875|P19388|P24928
55029	0.020842	0.072289	5	24	1109	16280	nuclear DNA-directed RNA polymerase complex	Q9Y2Y1|P30876|P62875|P19388|P24928
16604	0.021286	0.073319	14	113	1109	16280	nuclear body	P18583|Q8WWY3|Q86XP3|P61011|Q12874|Q9UBB9|O00571|Q08170|O75400|Q13627|P23497|Q6P2Q9|Q86U44|P29590
777	0.022364	0.076502	6	33	1109	16280	condensed chromosome kinetochore	Q71F23|Q7Z460|Q8WUM0|O43683|O14777|O60566
5676	0.025361	0.085207	2	4	1109	16280	condensin complex	Q15021|Q9NTJ3
5682	0.025361	0.085207	2	4	1109	16280	snRNP U5	O75643|Q6P2Q9
5626	0.025425	0.085207	52	580	1109	16280	insoluble fraction	O15427|Q16864|P13987|P55061|P39656|P09601|Q9BY50|Q00987|Q9H3N1|P62424|Q13564|P23219|P05023|O60506|O15121|P49755|Q13813|P04637|Q16186|O00299|P07237|Q16678|Q15005|O60488|Q9Y6K5|P23443|P12956|P08581|O95573|Q96F07|P60520|P33121|Q9NZN4|P35222|Q14168|P42892|P14625|O15438|O75881|Q6NZI2|P35610|Q9UI12|P49279|Q9H3H5|O15533|P38435|O95864|P34810|P62330|Q12802|Q07837|P29590
779	0.025641	0.085354	6	34	1109	16280	condensed chromosome, centromeric region	Q71F23|Q7Z460|Q8WUM0|O43683|O14777|O60566
44430	0.027058	0.089472	62	712	1109	16280	cytoskeletal part	P46940|Q9Y2Y0|Q13045|Q01082|Q9UHD8|Q9BVG8|P05783|P11171|P68371|Q14141|O43491|Q08211|P15311|Q9Y657|O43707|O95166|Q9Y266|O95359|Q9NP97|Q9NYC9|P30622|Q15019|P68363|Q96JB1|P35579|Q13813|Q9H0H5|P35580|P14635|P02545|P47756|Q7Z406|P08727|Q8TD57|P61158|Q8TAP6|Q15121|P06493|O60566|P62158|Q9NVX0|Q99661|P33981|P61160|Q12965|P08670|P29966|Q96AC1|Q13509|Q9Y6D9|O15144|O43683|P60660|Q8WYJ6|Q14511|Q7Z460|Q9NRC6|…
5819	0.027947	0.091799	10	74	1109	16280	spindle	Q9H0H5|Q7Z460|P33981|O43683|Q9Y6D9|Q9Y657|Q14511|P06493|O60566|P62158
30880	0.028836	0.094097	5	26	1109	16280	RNA polymerase complex	Q9Y2Y1|P30876|P62875|P19388|P24928
44429	0.03702	0.12001	48	542	1109	16280	mitochondrial part	Q9Y291|Q9Y2Y0|O14949|O15239|O75964|O14925|P09669|Q9NP81|O95573|Q9Y2R5|O00483|P33121|Q9UG63|P15954|O95168|P54819|P35232|Q9H2D1|P52789|P00403|O95167|Q16891|P14854|Q96GW9|Q9P0J0|P20674|Q07820|O95139|Q96AG3|Q9Y5L4|Q16611|P19367|P99999|Q9NZJ7|O95298|P48201|P10809|Q07812|P04150|Q00325|P07919|P55084|P25705|O60313|O60488|Q07837|Q9BUP0|P13196
30118	0.037329	0.12023	6	37	1109	16280	clathrin coat	P53677|Q10567|Q00610|Q9Y6Q5|P63010|Q96CW1
15630	0.038152	0.12098	37	402	1109	16280	microtubule cytoskeleton	Q9Y2Y0|Q13045|Q9UHD8|Q9BVG8|P05783|Q8TAP6|P30153|Q15121|P06493|O60566|P68371|P62158|Q9NVX0|Q99661|Q08211|P33981|P29966|Q9Y657|O95166|Q9Y266|O95359|Q9NP97|Q9NYC9|Q13509|Q9Y6D9|O43683|P30622|P68363|Q14511|Q96JB1|Q9H0H5|Q7Z460|P14635|Q8TD57|Q15691|Q96AQ6|Q96DT5
5741	0.038445	0.12098	10	78	1109	16280	mitochondrial outer membrane	Q07812|P52789|O14925|O95573|O60313|Q07820|P33121|O60488|Q16611|P19367
48471	0.038445	0.12098	10	78	1109	16280	perinuclear region of cytoplasm	Q15436|Q01105|P14625|Q9UHD8|O75190|Q96F07|P31946|O43707|Q9UBB4|P14679
30131	0.038537	0.12098	5	28	1109	16280	clathrin adaptor complex	P53677|Q10567|Q9Y6Q5|P63010|Q96CW1
5577	0.040374	0.12438	2	5	1109	16280	fibrinogen complex	P02671|P02675
43034	0.040374	0.12438	2	5	1109	16280	costamere	P18206|P08727
5782	0.040374	0.12438	2	5	1109	16280	peroxisomal matrix	P51659|Q86WA8
5912	0.0426	0.13043	7	48	1109	16280	adherens junction	P18206|Q9Y490|Q15654|Q14289|P35221|O00560|P35222
5930	0.043211	0.13149	4	20	1109	16280	axoneme	Q9NYC9|Q8TD57|Q96JB1|Q96DT5
5833	0.043627	0.13161	3	12	1109	16280	hemoglobin complex	P69905|P69892|P68871
5625	0.043804	0.13161	20	195	1109	16280	soluble fraction	P07355|P49585|P49588|P14868|Q13867|P02675|Q9H2M9|Q14627|P30153|P06737|O95373|P07814|O00299|P08243|Q9Y696|O00255|O00165|P08174|P25098|P23381
30119	0.044048	0.13161	5	29	1109	16280	AP-type membrane coat adaptor complex	P53677|Q10567|Q9Y6Q5|P63010|Q96CW1
43235	0.047912	0.1423	10	81	1109	16280	receptor complex	Q99650|P49458|P32297|P06756|P30532|P04626|P11912|O00560|P05107|P23229
30658	0.050598	0.1485	4	21	1109	16280	transport vesicle membrane	Q15437|Q15436|P53992|Q00610
42613	0.050598	0.1485	4	21	1109	16280	MHC class II protein complex	P01903|P06340|P01906|P20036
31968	0.051047	0.14894	11	93	1109	16280	organelle outer membrane	Q8NF91|Q07812|P52789|O14925|O95573|O60313|Q07820|P33121|O60488|Q16611|P19367
30659	0.052026	0.15009	13	116	1109	16280	cytoplasmic vesicle membrane	P49755|P35606|P14679|Q15437|Q15436|P14770|O15498|Q9Y678|P61923|P53992|Q00610|P53618|O14579
44433	0.052047	0.15009	16	151	1109	16280	cytoplasmic vesicle part	P02671|P02675|P49755|P35606|P14679|Q15437|Q15436|P14770|O15498|Q9Y678|P61923|P53992|Q00610|P01137|O14579|P53618
32156	0.053922	0.15371	3	13	1109	16280	septin cytoskeleton	Q15019|Q8WYJ6|Q14141
31105	0.053922	0.15371	3	13	1109	16280	septin complex	Q15019|Q8WYJ6|Q14141
8287	0.056415	0.15965	5	31	1109	16280	protein serine/threonine phosphatase complex	P99999|P63151|Q08209|P30153|Q14738
33178	0.057865	0.15965	2	6	1109	16280	proton-transporting two-sector ATPase complex, catalytic domain	P25705|Q9UI12
5959	0.057865	0.15965	2	6	1109	16280	DNA-dependent protein kinase complex	P12956|P78527
5663	0.057865	0.15965	2	6	1109	16280	DNA replication factor C complex	P35249|P12004
5675	0.057865	0.15965	2	6	1109	16280	holo TFIIH complex	Q96T76|P18074
19867	0.057937	0.15965	11	95	1109	16280	outer membrane	Q8NF91|Q07812|P52789|O14925|O95573|O60313|Q07820|P33121|O60488|Q16611|P19367
16591	0.0628	0.16482	10	85	1109	16280	DNA-directed RNA polymerase II, holoenzyme	Q96PK6|Q96T76|P30876|Q9NVC6|P62875|P18074|P29083|P19388|Q93074|P24928
33116	0.06526	0.16482	3	14	1109	16280	ER-Golgi intermediate compartment membrane	Q15437|Q9Y282|P51572
19818	0.065416	0.16482	11	97	1109	16280	peroxisome	P51659|O00116|P30044|Q8WVX9|Q86WA8|O95573|P04040|Q9Y5Y5|P33121|O60488|Q96CW1
42579	0.065416	0.16482	11	97	1109	16280	microbody	P51659|O00116|P30044|Q8WVX9|Q86WA8|O95573|P04040|Q9Y5Y5|P33121|O60488|Q96CW1
5884	0.0673	0.16482	4	23	1109	16280	actin filament	P46940|P15311|P68133|Q96AC1
31592	0.06812	0.16482	1	1	1109	16280	centrosomal corona	Q7Z460
31528	0.06812	0.16482	1	1	1109	16280	microvillus membrane	P35222
125	0.06812	0.16482	1	1	1109	16280	PCAF complex	Q9Y4A5
33180	0.06812	0.16482	1	1	1109	16280	proton-transporting V-type ATPase, V1 domain	Q9UI12
16442	0.06812	0.16482	1	1	1109	16280	RNA-induced silencing complex	Q7KZF4
221	0.06812	0.16482	1	1	1109	16280	vacuolar proton-transporting V-type ATPase, V1 domain	Q9UI12
42555	0.06812	0.16482	1	1	1109	16280	MCM complex	P33993
31332	0.06812	0.16482	1	1	1109	16280	RNAi effector complex	Q7KZF4
35030	0.06812	0.16482	1	1	1109	16280	1-phosphatidylinositol-4-phosphate 3-kinase, class IA complex	P27986
42587	0.06812	0.16482	1	1	1109	16280	glycogen granule	P49327
42585	0.06812	0.16482	1	1	1109	16280	germinal vesicle	P29966
43626	0.06812	0.16482	1	1	1109	16280	PCNA complex	P12004
5971	0.06812	0.16482	1	1	1109	16280	ribonucleoside-diphosphate reductase complex	P23921
31095	0.06812	0.16482	1	1	1109	16280	platelet dense tubular network membrane	Q14643
1650	0.06812	0.16482	1	1	1109	16280	fibrillar center	Q9Y262
5900	0.06812	0.16482	1	1	1109	16280	oncostatin-M receptor complex	Q99650
9320	0.06812	0.16482	1	1	1109	16280	phosphoribosylaminoimidazole carboxylase complex	P22234
9330	0.06812	0.16482	1	1	1109	16280	DNA topoisomerase complex (ATP-hydrolyzing)	P11388
797	0.06812	0.16482	1	1	1109	16280	condensin core heterodimer	Q15021
46540	0.06812	0.16482	1	1	1109	16280	U4/U6 x U5 tri-snRNP complex	Q8WWY3
12506	0.071953	0.17325	13	122	1109	16280	vesicle membrane	P49755|P35606|P14679|Q15437|Q15436|P14770|O15498|Q9Y678|P61923|P53992|Q00610|P53618|O14579
35097	0.077425	0.18502	2	7	1109	16280	histone methyltransferase complex	Q9UBL3|O00255
43596	0.077589	0.18502	3	15	1109	16280	nuclear replication fork	P33993|P15927|P25205
42995	0.080537	0.19113	32	363	1109	16280	cell projection	P60953|Q14444|P08581|P35221|P35222|Q9UBB4|Q9UH65|P15311|P61160|Q9Y696|Q16790|P60763|Q00534|O43707|Q9NYC9|P04083|Q9Y490|O15144|P26038|Q14511|Q96JB1|P35579|O00299|Q16658|Q8TD57|Q9Y6N9|Q2M1Z3|P62330|O60313|P61158|Q96DT5|P01137
5753	0.090848	0.21457	3	16	1109	16280	mitochondrial proton-transporting ATP synthase complex	P48201|O75964|P25705
5624	0.091308	0.21464	47	566	1109	16280	membrane fraction	O15427|Q16864|Q9Y6K5|P13987|P23443|P12956|P39656|P08581|O95573|P60520|Q96F07|P09601|Q9NZN4|P33121|P35222|Q14168|Q9BY50|P42892|P14625|Q9H3N1|P62424|O15438|P23219|O75881|P05023|O60506|Q6NZI2|P35610|O15121|P49755|P49279|Q9UI12|Q9H3H5|O15533|Q13813|Q16186|O00299|P38435|O95864|P34810|P07237|P62330|Q16678|Q12802|Q15005|O60488|Q07837
30286	0.095122	0.22255	5	36	1109	16280	dynein complex	Q9NYC9|Q9NP97|Q8TD57|Q96JB1|Q96DT5
30132	0.098694	0.22875	2	8	1109	16280	clathrin coat of coated pit	Q00610|Q96CW1
5890	0.098694	0.22875	2	8	1109	16280	sodium:potassium-exchanging ATPase complex	P05023|P05026
228	0.10072	0.23235	10	93	1109	16280	nuclear chromosome	P84243|P33993|P05412|O60216|P45973|Q9UNS1|Q9BYG3|P49736|P15927|P25205
31252	0.10237	0.23506	8	70	1109	16280	leading edge	P15311|Q9Y490|P62330|Q00534|P35221|P61158|P35222|P35579
5732	0.10497	0.23993	3	17	1109	16280	small nucleolar ribonucleoprotein complex	O75691|Q9Y2X3|Q9NPE3
5667	0.11998	0.26659	13	133	1109	16280	transcription factor complex	P61968|Q96T76|Q99814|P12956|Q16665|P29083|P35222|Q96PK6|Q9NVC6|P05412|P18074|Q9Y6Y0|P15884
5790	0.12135	0.26659	2	9	1109	16280	smooth endoplasmic reticulum	Q15436|O95166
5796	0.12135	0.26659	2	9	1109	16280	Golgi lumen	Q13356|P01137
9929	0.13142	0.26659	16	173	1109	16280	cell surface	P31785|P11912|P27797|O14672|O43847|O96005|O43187|Q14168|P11142|P07237|P31431|O75787|Q13291|Q00839|O14836|P04792
5592	0.1316	0.26659	1	2	1109	16280	collagen type XI	P12107
214	0.1316	0.26659	1	2	1109	16280	tRNA-intron endonuclease complex	Q9BSV6
32301	0.1316	0.26659	1	2	1109	16280	MutSalpha complex	P43246
32302	0.1316	0.26659	1	2	1109	16280	MutSbeta complex	P43246
31254	0.1316	0.26659	1	2	1109	16280	trailing edge	P35579
42629	0.1316	0.26659	1	2	1109	16280	mast cell granule	P10124
31094	0.1316	0.26659	1	2	1109	16280	platelet dense tubular network	Q14643
10494	0.1316	0.26659	1	2	1109	16280	stress granule	P26196
5915	0.1316	0.26659	1	2	1109	16280	zonula adherens	P35221
5895	0.1316	0.26659	1	2	1109	16280	interleukin-5 receptor complex	O00560
9346	0.1316	0.26659	1	2	1109	16280	citrate lyase complex	P53396
31213	0.1316	0.26659	1	2	1109	16280	RSF complex	O60264
8043	0.1316	0.26659	1	2	1109	16280	ferritin complex	P02792
1917	0.1316	0.26659	1	2	1109	16280	photoreceptor inner segment	Q9Y6N9
43209	0.1316	0.26659	1	2	1109	16280	myelin sheath	P02686
940	0.1316	0.26659	1	2	1109	16280	outer kinetochore of condensed chromosome	O60566
5845	0.1316	0.26659	1	2	1109	16280	mRNA cap binding complex	P52298
43080	0.1316	0.26659	1	2	1109	16280	female germ cell nucleus	P29966
17177	0.1316	0.26659	1	2	1109	16280	alpha-glucosidase II complex	Q14697
34518	0.1316	0.26659	1	2	1109	16280	RNA cap binding complex	P52298
5785	0.1316	0.26659	1	2	1109	16280	signal recognition particle receptor complex	P49458
30870	0.1316	0.26659	1	2	1109	16280	Mre11 complex	O60934
1931	0.1316	0.26659	1	2	1109	16280	uropod	P35579
5679	0.13168	0.26659	4	29	1109	16280	chromatin remodeling complex	Q9Y294|P55209|O94776|O60264
44454	0.13552	0.27215	7	63	1109	16280	nuclear chromosome part	P84243|P33993|P45973|Q9UNS1|P49736|P15927|P25205
45259	0.13553	0.27215	3	19	1109	16280	proton-transporting ATP synthase complex	P48201|O75964|P25705
1726	0.1442	0.28559	5	41	1109	16280	ruffle	P15311|Q9Y490|P62330|Q00534|P35579
5925	0.14425	0.28559	4	30	1109	16280	focal adhesion	P18206|Q9Y490|Q15654|Q14289
30496	0.1451	0.28559	2	10	1109	16280	midbody	P35580|P06493
5684	0.1451	0.28559	2	10	1109	16280	U2-dependent spliceosome	O75643|Q6P2Q9
30867	0.1451	0.28559	2	10	1109	16280	rough endoplasmic reticulum membrane	P49458|P51571
118	0.15182	0.29763	3	20	1109	16280	histone deacetylase complex	Q09028|Q92769|O94776
32993	0.15876	0.31002	9	90	1109	16280	protein-DNA complex	P84243|P16402|Q96A08|Q71DI3|P15927|Q96QV6|P25205|P16104|P62805
5689	0.16969	0.32629	2	11	1109	16280	U12-dependent spliceosome	O75643|Q6P2Q9
5776	0.16969	0.32629	2	11	1109	16280	autophagic vacuole	P60520|O95166
5801	0.16969	0.32629	2	11	1109	16280	cis-Golgi network	Q9Y5R8|P49755
9897	0.16972	0.32629	6	55	1109	16280	external side of plasma membrane	P31785|P27797|P11912|O75787|O96005|O14836
119	0.18606	0.33553	3	22	1109	16280	mediator complex	Q96PK6|Q9NVC6|Q93074
790	0.18606	0.33553	3	22	1109	16280	nuclear chromatin	P84243|P45973|Q9UNS1
5739	0.19044	0.33553	69	911	1109	16280	mitochondrion	Q9Y2Y0|O14949|P78549|O75964|P30153|Q9NP81|O00483|P11586|O95168|P54819|Q9Y696|P52789|O95167|Q9P0J0|Q96GW9|Q07820|Q9BYC9|Q9NZJ7|P04637|O95298|Q9H3K2|P21980|P10809|Q07812|Q00325|P56378|O60313|Q9BUP0|O60488|Q9Y291|P51659|Q96TA2|O15239|O14925|P09669|O95573|Q9Y2R5|P33121|Q96C01|Q9UG63|P15954|P30044|P08107|P35232|Q9H2D1|O00165|P00403|Q13794|Q16891|Q13405|Q6NZI2|P14854|Q9BWH2|P20674|O95139|Q96AG3|Q9Y5L4|…
42788	0.19077	0.33553	1	3	1109	16280	polysomal ribosome	P62424
30480	0.19077	0.33553	1	3	1109	16280	contractile ring	P35579
176	0.19077	0.33553	1	3	1109	16280	nuclear exosome (RNase complex)	Q01780
19814	0.19077	0.33553	1	3	1109	16280	immunoglobulin complex	P11912
32300	0.19077	0.33553	1	3	1109	16280	mismatch repair complex	P43246
300	0.19077	0.33553	1	3	1109	16280	peripheral to membrane of membrane fraction	Q9UI12
51233	0.19077	0.33553	1	3	1109	16280	spindle midzone	O60566
42570	0.19077	0.33553	1	3	1109	16280	B cell receptor complex	P11912
42589	0.19077	0.33553	1	3	1109	16280	zymogen granule membrane	P49755
5955	0.19077	0.33553	1	3	1109	16280	calcineurin complex	Q08209
1740	0.19077	0.33553	1	3	1109	16280	Barr body	P84243
42405	0.19077	0.33553	1	3	1109	16280	nuclear inclusion body	O60934
30061	0.19077	0.33553	1	3	1109	16280	mitochondrial crista	O60313
805	0.19077	0.33553	1	3	1109	16280	X chromosome	P84243
34430	0.19077	0.33553	1	3	1109	16280	monolayer-surrounded lipid storage body outer lipid monolayer	Q96AD5
5653	0.19077	0.33553	1	3	1109	16280	nuclear envelope lumen	P06276
5673	0.19077	0.33553	1	3	1109	16280	transcription factor TFIIE complex	P29083
5849	0.19077	0.33553	1	3	1109	16280	mRNA cleavage factor complex	O94913
5784	0.19077	0.33553	1	3	1109	16280	translocon complex	P51571
5787	0.19077	0.33553	1	3	1109	16280	signal peptidase complex	Q15005
5816	0.19077	0.33553	1	3	1109	16280	spindle pole body	O43683
8023	0.19491	0.3392	2	12	1109	16280	transcription elongation factor complex	Q9UNY4|Q6IA86
5744	0.19491	0.3392	2	12	1109	16280	mitochondrial inner membrane presequence translocase complex	O14925|Q9Y5L4
5811	0.19491	0.3392	2	12	1109	16280	lipid particle	Q96AD5|Q99541
5774	0.19823	0.34331	7	70	1109	16280	vacuolar membrane	P34810|P27449|Q15904|P60520|Q9UI12|O95166|Q9H269
5924	0.19865	0.34331	4	34	1109	16280	cell-substrate adherens junction	P18206|Q9Y490|Q15654|Q14289
33177	0.22054	0.37081	2	13	1109	16280	proton-transporting two-sector ATPase complex, proton-transporting domain	P48201|O75964
43601	0.22054	0.37081	2	13	1109	16280	nuclear replisome	P15927|P25205
31461	0.22054	0.37081	2	13	1109	16280	cullin-RING ubiquitin ligase complex	Q13620|Q13618
5913	0.22054	0.37081	2	13	1109	16280	cell-cell adherens junction	P35221|P35222
5892	0.22054	0.37081	2	13	1109	16280	nicotinic acetylcholine-gated receptor-channel complex	P32297|P30532
45263	0.22054	0.37081	2	13	1109	16280	proton-transporting ATP synthase complex, coupling factor F(o)	P48201|O75964
5720	0.22054	0.37081	2	13	1109	16280	nuclear heterochromatin	P84243|P45973
30894	0.22054	0.37081	2	13	1109	16280	replisome	P15927|P25205
42611	0.22687	0.38016	5	48	1109	16280	MHC protein complex	P61769|P01903|P06340|P01906|P20036
30055	0.22787	0.38055	4	36	1109	16280	cell-substrate junction	P18206|Q9Y490|Q15654|Q14289
44437	0.23833	0.38678	7	74	1109	16280	vacuolar part	P34810|P27449|Q15904|P60520|Q9UI12|O95166|Q9H269
5874	0.23955	0.38678	19	233	1109	16280	microtubule	Q9NP97|Q9NYC9|Q13509|Q9UHD8|P30622|Q9BVG8|P68363|P06493|Q96JB1|P68371|Q99661|Q9H0H5|Q7Z460|Q8TD57|Q15691|O95166|Q96AQ6|Q9Y266|Q96DT5
45177	0.24081	0.38678	9	100	1109	16280	apical part of cell	P15311|P04626|P26038|P37088|Q9Y6N9|Q8NI35|Q9UBD6|P15941|P35222
42824	0.2459	0.38678	1	4	1109	16280	MHC class I peptide loading complex	O15533
35085	0.2459	0.38678	1	4	1109	16280	cilium axoneme	Q9NYC9
42588	0.2459	0.38678	1	4	1109	16280	zymogen granule	P49755
10369	0.2459	0.38678	1	4	1109	16280	chromocenter	P45973
16942	0.2459	0.38678	1	4	1109	16280	insulin-like growth factor binding protein complex	P17936
31229	0.2459	0.38678	1	4	1109	16280	intrinsic to nuclear inner membrane	Q14739
31143	0.2459	0.38678	1	4	1109	16280	pseudopodium	O43707
5721	0.2459	0.38678	1	4	1109	16280	centromeric heterochromatin	Q9NRZ9
5639	0.2459	0.38678	1	4	1109	16280	integral to nuclear inner membrane	Q14739
5652	0.2459	0.38678	1	4	1109	16280	nuclear lamina	P12004
5828	0.2459	0.38678	1	4	1109	16280	kinetochore microtubule	Q7Z460
43073	0.2459	0.38678	1	4	1109	16280	germ cell nucleus	P29966
5771	0.2459	0.38678	1	4	1109	16280	multivesicular body	P11912
30877	0.2459	0.38678	1	4	1109	16280	beta-catenin destruction complex	P35222
30868	0.2459	0.38678	1	4	1109	16280	smooth endoplasmic reticulum membrane	Q15436
5942	0.24642	0.38678	2	14	1109	16280	phosphoinositide 3-kinase complex	P27986|O00459
30133	0.26586	0.41599	5	51	1109	16280	transport vesicle	Q15437|Q15436|P53992|P21810|Q00610
786	0.26998	0.4211	7	77	1109	16280	nucleosome	P84243|P16402|Q96A08|Q71DI3|Q96QV6|P16104|P62805
44463	0.29263	0.4417	5	53	1109	16280	cell projection part	Q9NYC9|Q8TD57|Q96JB1|P35222|Q96DT5
5909	0.29592	0.4417	9	106	1109	16280	coated vesicle	Q15437|Q15436|Q9Y678|P61923|P35606|P53992|Q00610|O14579|P53618
8305	0.29722	0.4417	3	28	1109	16280	integrin complex	P06756|P05107|P23229
33176	0.29728	0.4417	1	5	1109	16280	proton-transporting V-type ATPase complex	Q9UI12
5587	0.29728	0.4417	1	5	1109	16280	collagen type IV	P29400
16471	0.29728	0.4417	1	5	1109	16280	vacuolar proton-transporting V-type ATPase complex	Q9UI12
5916	0.29728	0.4417	1	5	1109	16280	fascia adherens	P35222
1739	0.29728	0.4417	1	5	1109	16280	sex chromatin	P84243
45261	0.29728	0.4417	1	5	1109	16280	proton-transporting ATP synthase complex, catalytic core F(1)	P25705
5697	0.29728	0.4417	1	5	1109	16280	telomerase holoenzyme complex	O60832
803	0.29728	0.4417	1	5	1109	16280	sex chromosome	P84243
5658	0.29728	0.4417	1	5	1109	16280	alpha DNA polymerase:primase complex	P25205
5851	0.29728	0.4417	1	5	1109	16280	eukaryotic translation initiation factor 2B complex	P49770
30667	0.29833	0.4417	2	16	1109	16280	secretory granule membrane	P14770|P49755
152	0.29833	0.4417	2	16	1109	16280	nuclear ubiquitin ligase complex	P46736|O60566
1772	0.29833	0.4417	2	16	1109	16280	immunological synapse	P11912|P35579
5791	0.29833	0.4417	2	16	1109	16280	rough endoplasmic reticulum	P49458|P51571
9925	0.32411	0.47512	2	17	1109	16280	basal plasma membrane	Q8N307|P08581
30018	0.32411	0.47512	2	17	1109	16280	Z disc	P08727|P35222
5876	0.32411	0.47512	2	17	1109	16280	spindle microtubule	Q7Z460|P06493
16324	0.32488	0.47512	7	82	1109	16280	apical plasma membrane	P15311|P04626|P26038|P37088|Q8NI35|Q9UBD6|P15941
5815	0.33272	0.47512	12	151	1109	16280	microtubule organizing center	Q9Y2Y0|Q7Z460|Q13045|P14635|Q08211|O43683|Q9Y6D9|P29966|Q8TAP6|P05783|O95359|Q9NVX0
5773	0.33713	0.47512	17	221	1109	16280	vacuole	P10619|P27449|Q9UI12|P60520|P07711|P61916|P51149|Q9H269|Q96RU3|P14679|Q9H0H5|P01903|P10124|P38571|P34810|Q15904|O95166
19898	0.34184	0.47512	6	70	1109	16280	extrinsic to membrane	O14775|P15311|Q9Y2J2|P26038|P11171|O43491
42765	0.34517	0.47512	1	6	1109	16280	GPI-anchor transamidase complex	Q969N2
35267	0.34517	0.47512	1	6	1109	16280	NuA4 histone acetyltransferase complex	Q9Y4A5
45009	0.34517	0.47512	1	6	1109	16280	chitosome	P14679
33162	0.34517	0.47512	1	6	1109	16280	melanosome membrane	P14679
16461	0.34517	0.47512	1	6	1109	16280	unconventional myosin complex	P60660
16234	0.34517	0.47512	1	6	1109	16280	inclusion body	O60934
15030	0.34517	0.47512	1	6	1109	16280	Cajal body	Q8WWY3
32420	0.34517	0.47512	1	6	1109	16280	stereocilium	Q9Y6N9
32421	0.34517	0.47512	1	6	1109	16280	stereocilium bundle	Q9Y6N9
8290	0.34517	0.47512	1	6	1109	16280	F-actin capping protein complex	P47756
808	0.34517	0.47512	1	6	1109	16280	origin recognition complex	P49736
5662	0.34517	0.47512	1	6	1109	16280	DNA replication factor A complex	P15927
5678	0.34517	0.47512	1	6	1109	16280	chromatin assembly complex	P55209
5664	0.34517	0.47512	1	6	1109	16280	nuclear origin of replication recognition complex	P49736
30935	0.34517	0.47512	1	6	1109	16280	sheet-forming collagen	P29400
5868	0.34517	0.47512	1	6	1109	16280	cytoplasmic dynein complex	Q9NP97
5813	0.34808	0.47512	11	139	1109	16280	centrosome	Q9Y2Y0|Q7Z460|Q13045|P14635|Q08211|Q9Y6D9|P29966|Q8TAP6|P05783|O95359|Q9NVX0
314	0.34964	0.47512	2	18	1109	16280	organellar small ribosomal subunit	Q9Y291|Q9Y2R5
45178	0.34964	0.47512	2	18	1109	16280	basal part of cell	Q8N307|P08581
42383	0.34964	0.47512	2	18	1109	16280	sarcolemma	P04083|P08727
5637	0.34964	0.47512	2	18	1109	16280	nuclear inner membrane	Q14739|P43243
5871	0.34964	0.47512	2	18	1109	16280	kinesin complex	Q99661|Q9BVG8
5763	0.34964	0.47512	2	18	1109	16280	mitochondrial small ribosomal subunit	Q9Y291|Q9Y2R5
31091	0.35203	0.47706	4	44	1109	16280	platelet alpha granule	P02671|P14770|P02675|P01137
16605	0.37483	0.50658	2	19	1109	16280	PML body	P23497|P29590
42719	0.38979	0.51972	1	7	1109	16280	mitochondrial intermembrane space protein transporter complex	Q9Y5L4
1750	0.38979	0.51972	1	7	1109	16280	photoreceptor outer segment	Q9Y6N9
43189	0.38979	0.51972	1	7	1109	16280	H4/H2A histone acetyltransferase complex	Q9Y4A5
5666	0.38979	0.51972	1	7	1109	16280	DNA-directed RNA polymerase III complex	Q9Y2Y1
34451	0.38979	0.51972	1	7	1109	16280	centriolar satellite	P05783
31093	0.39245	0.52186	3	33	1109	16280	platelet alpha granule lumen	P02671|P02675|P01137
44431	0.39433	0.52296	30	415	1109	16280	Golgi apparatus part	Q9UM00|P35606|P60520|Q9NP61|P14679|Q13356|Q9Y5R8|P61769|O15498|Q9Y678|P51572|P53992|Q00610|O95166|O14579|Q9UP83|P49755|P35613|O14672|O15533|Q9NY97|Q15437|O43164|Q15436|Q15392|P61923|Q8NF37|Q86YR5|P01137|P53618
16363	0.39942	0.5283	4	47	1109	16280	nuclear matrix	P04637|O00255|P23528|P43243
16459	0.40252	0.53099	5	61	1109	16280	myosin complex	P35580|Q12965|Q7Z406|P60660|P35579
5911	0.40978	0.53913	11	146	1109	16280	intercellular junction	Q99439|P18206|Q16625|Q9Y490|Q9Y2J2|P08034|Q8NI35|P41240|Q9UDY2|P35221|P35222
5875	0.4129	0.5418	9	118	1109	16280	microtubule associated complex	Q99661|Q9NYC9|Q9NP97|Q9BVG8|Q8TD57|Q15121|Q96JB1|O95166|Q96DT5
5794	0.41958	0.54911	48	680	1109	16280	Golgi apparatus	P61204|Q8NBZ7|Q9BVG8|Q9UM00|P35606|P60520|Q9Y6Q5|Q9NP61|P14679|Q13356|P61769|Q9Y5R8|P18085|O15498|Q8NF91|Q9Y678|P53992|P51572|Q00610|Q13618|O95166|O14579|Q9Y282|Q9UP83|P49755|P35613|O14672|Q14511|O15533|Q9NY97|Q15437|Q9P2E5|O43164|Q15436|Q7Z460|Q14697|Q15392|P53677|P10124|P61923|Q15691|P62330|Q10567|Q86YR5|Q8NF37|P01137|P21399|P53618
60205	0.42977	0.5572	3	35	1109	16280	cytoplasmic membrane-bounded vesicle lumen	P02671|P02675|P01137
31983	0.42977	0.5572	3	35	1109	16280	vesicle lumen	P02671|P02675|P01137
5583	0.43138	0.5572	1	8	1109	16280	fibrillar collagen	P12107
34364	0.43138	0.5572	1	8	1109	16280	high-density lipoprotein particle	P11597
5881	0.43138	0.5572	1	8	1109	16280	cytoplasmic microtubule	Q7Z460
5905	0.44812	0.57732	3	36	1109	16280	coated pit	Q00610|P63010|Q96CW1
5604	0.46152	0.59304	4	51	1109	16280	basement membrane	P07355|P14543|P55268|P29400
44441	0.47013	0.59434	1	9	1109	16280	cilium part	Q9NYC9
17119	0.47013	0.59434	1	9	1109	16280	Golgi transport complex	Q9UP83
43191	0.47013	0.59434	1	9	1109	16280	ATP-binding cassette (ABC) transporter complex	Q9UG63
5844	0.47013	0.59434	1	9	1109	16280	polysome	P62424
12511	0.47013	0.59434	1	9	1109	16280	monolayer-surrounded lipid storage body	Q96AD5
31941	0.47013	0.59434	1	9	1109	16280	filamentous actin	Q96AC1
31674	0.47092	0.59434	2	23	1109	16280	I band	P08727|P35222
5768	0.48842	0.61487	16	228	1109	16280	endosome	P62745|O95405|Q96QK1|P30622|P11912|Q96L33|Q96FZ7|O60759|P51149|Q9H269|P61769|O15498|P34810|P62330|Q96L92|P00533
5770	0.49174	0.61748	4	53	1109	16280	late endosome	P62745|P11912|P51149|Q9H269
30176	0.50163	0.62462	3	39	1109	16280	integral to endoplasmic reticulum membrane	Q9BUN8|O75460|Q969N2
30027	0.50163	0.62462	3	39	1109	16280	lamellipodium	P35221|P61158|P35222
16272	0.50625	0.62462	1	10	1109	16280	prefoldin complex	O15212
16328	0.50625	0.62462	1	10	1109	16280	lateral plasma membrane	P35222
32040	0.50625	0.62462	1	10	1109	16280	small-subunit processome	Q9UNX4
31092	0.50625	0.62462	1	10	1109	16280	platelet alpha granule membrane	P14770
31201	0.50625	0.62462	1	10	1109	16280	SNARE complex	O15498
139	0.51324	0.63138	25	364	1109	16280	Golgi membrane	Q9UM00|P35606|P60520|Q9NP61|P61769|O15498|Q9Y678|P51572|P53992|Q00610|O95166|O14579|Q9UP83|P49755|P35613|O15533|Q9NY97|Q15437|Q15436|O43164|Q15392|P61923|Q8NF37|Q86YR5|P53618
44450	0.51554	0.63138	2	25	1109	16280	microtubule organizing center part	Q7Z460|P05783
781	0.51554	0.63138	2	25	1109	16280	chromosome, telomeric region	Q5UIP0|O60934
44452	0.5369	0.65591	2	26	1109	16280	nucleolar part	Q9UNX4|Q9Y262
30685	0.57127	0.68112	1	12	1109	16280	nucleolar preribosome	Q9UNX4
30684	0.57127	0.68112	1	12	1109	16280	preribosome	Q9UNX4
31513	0.57127	0.68112	1	12	1109	16280	nonmotile primary cilium	Q9Y6N9
123	0.57127	0.68112	1	12	1109	16280	histone acetyltransferase complex	Q9Y4A5
178	0.57127	0.68112	1	12	1109	16280	exosome (RNase complex)	Q01780
31253	0.57127	0.68112	1	12	1109	16280	cell projection membrane	P35222
5952	0.57127	0.68112	1	12	1109	16280	cAMP-dependent protein kinase complex	P10644
31231	0.57127	0.68112	1	12	1109	16280	intrinsic to peroxisomal membrane	Q9Y5Y5
5680	0.57127	0.68112	1	12	1109	16280	anaphase-promoting complex	O60566
5779	0.57127	0.68112	1	12	1109	16280	integral to peroxisomal membrane	Q9Y5Y5
5769	0.57761	0.68704	4	59	1109	16280	early endosome	O95405|P61769|Q96L92|O60759
323	0.59589	0.70539	13	198	1109	16280	lytic vacuole	P10619|P07711|P61916|P51149|Q96RU3|Q9H269|P14679|P01903|Q9H0H5|P10124|P38571|P34810|O95166
5764	0.59589	0.70539	13	198	1109	16280	lysosome	P10619|P07711|P61916|P51149|Q96RU3|Q9H269|P14679|P01903|Q9H0H5|P10124|P38571|P34810|O95166
5605	0.60049	0.70579	1	13	1109	16280	basal lamina	P55268
30130	0.60049	0.70579	1	13	1109	16280	clathrin coat of trans-Golgi network vesicle	Q00610
5865	0.60049	0.70579	1	13	1109	16280	striated muscle thin filament	P68133
31227	0.61495	0.72108	3	46	1109	16280	intrinsic to endoplasmic reticulum membrane	Q9BUN8|O75460|Q969N2
30141	0.62079	0.7262	5	78	1109	16280	secretory granule	P02671|P14770|P02675|P49755|P01137
46658	0.62773	0.73088	1	14	1109	16280	anchored to plasma membrane	P00450
12510	0.62773	0.73088	1	14	1109	16280	trans-Golgi network transport vesicle membrane	Q00610
5929	0.63212	0.73426	5	79	1109	16280	cilium	Q9NYC9|P04083|Q8TD57|Q9Y6N9|Q96DT5
32994	0.65311	0.75335	1	15	1109	16280	protein-lipid complex	P11597
5640	0.65311	0.75335	1	15	1109	16280	nuclear outer membrane	Q8NF91
34358	0.65311	0.75335	1	15	1109	16280	plasma lipoprotein particle	P11597
44420	0.67531	0.77702	5	83	1109	16280	extracellular matrix part	P07355|P14543|P12107|P55268|P29400
16599	0.67676	0.77702	1	16	1109	16280	caveola	Q6NZI2
5581	0.68372	0.7814	2	34	1109	16280	Cell Comp collagen	P12107|P29400
31902	0.68372	0.7814	2	34	1109	16280	late endosome membrane	P62745|Q9H269
30016	0.68935	0.78601	4	68	1109	16280	myofibril	P18206|P08727|P68133|P35222
30125	0.6988	0.79497	1	17	1109	16280	clathrin vesicle coat	Q00610
43296	0.70542	0.80065	5	86	1109	16280	apical junction complex	Q16625|Q8NI35|Q9UDY2|P35221|P35222
44449	0.72155	0.8171	4	71	1109	16280	contractile fiber part	P18206|P08727|P68133|P35222
16327	0.72437	0.81842	5	88	1109	16280	apicolateral plasma membrane	Q16625|Q8NI35|Q9UDY2|P35221|P35222
43025	0.74158	0.83597	2	38	1109	16280	cell soma	P63244|Q9UBB4
43292	0.75121	0.843	4	74	1109	16280	contractile fiber	P18206|P08727|P68133|P35222
30425	0.75456	0.843	2	39	1109	16280	dendrite	O60313|Q9UBB4
30615	0.75632	0.843	1	20	1109	16280	spindle pole	O43683
1533	0.75632	0.843	1	20	1109	16280	cornified envelope	P04083
5903	0.75632	0.843	1	20	1109	16280	brush border	O00299
45121	0.76542	0.85122	3	58	1109	16280	membrane raft	Q6NZI2|P11912|P08174
31901	0.78842	0.8748	1	22	1109	16280	early endosome membrane	P61769
14704	0.79014	0.8748	2	42	1109	16280	intercalated disc	P08034|P35222
19717	0.80095	0.88296	2	43	1109	16280	synaptosome	P23443|Q96F07
30140	0.80286	0.88296	1	23	1109	16280	trans-Golgi network transport vesicle	Q00610
5922	0.80286	0.88296	1	23	1109	16280	connexon complex	P08034
30054	0.80925	0.88803	25	426	1109	16280	cell junction	Q99439|P18206|P23443|Q14289|Q15654|P41240|Q96F07|P35221|Q9UDY2|P35222|Q16625|P32297|Q9Y2J2|P08034|Q8NI35|Q96AC1|Q9Y490|Q68CZ2|P30532|O00560|Q14511|O43164|Q2M1Z3|Q9HBL0|P26232
30017	0.81222	0.88932	3	63	1109	16280	sarcomere	P08727|P68133|P35222
30665	0.81631	0.88986	1	24	1109	16280	clathrin coated vesicle membrane	Q00610
5834	0.81631	0.88986	1	24	1109	16280	heterotrimeric G-protein complex	O14775
313	0.83046	0.90133	2	46	1109	16280	organellar ribosome	Q9Y291|Q9Y2R5
5761	0.83046	0.90133	2	46	1109	16280	mitochondrial ribosome	Q9Y291|Q9Y2R5
31301	0.83269	0.90178	5	102	1109	16280	integral to organelle membrane	Q9BUN8|O75460|Q969N2|Q14739|Q9Y5Y5
1669	0.84051	0.90827	1	26	1109	16280	acrosome	Q9H0H5
42612	0.8514	0.91803	1	27	1109	16280	MHC class I protein complex	P61769
5759	0.85856	0.92175	10	194	1109	16280	mitochondrial matrix	Q9Y291|P99999|P04150|P10809|Q96GW9|P55084|Q9NP81|P25705|Q9Y2R5|P13196
31980	0.85856	0.92175	10	194	1109	16280	mitochondrial lumen	Q9Y291|P99999|P04150|P10809|Q96GW9|P55084|Q9NP81|P25705|Q9Y2R5|P13196
5921	0.86154	0.92294	1	28	1109	16280	gap junction	P08034
5923	0.87661	0.93707	3	72	1109	16280	tight junction	Q16625|Q8NI35|Q9UDY2
794	0.88799	0.94719	1	31	1109	16280	condensed nuclear chromosome	Q9BYG3
31300	0.89534	0.95298	5	114	1109	16280	intrinsic to organelle membrane	Q9BUN8|O75460|Q969N2|Q14739|Q9Y5Y5
10008	0.90352	0.95963	5	116	1109	16280	endosome membrane	P62745|P61769|Q96L33|Q96FZ7|Q9H269
44440	0.9074	0.96002	5	117	1109	16280	endosomal part	P62745|P61769|Q96L33|Q96FZ7|Q9H269
5765	0.90776	0.96002	2	57	1109	16280	lysosomal membrane	P34810|Q9H269
19861	0.91558	0.96623	1	35	1109	16280	flagellum	P08581
19897	0.92135	0.97025	1	36	1109	16280	extrinsic to plasma membrane	O14775
30424	0.92672	0.97384	1	37	1109	16280	axon	P01137
5578	0.92957	0.97477	14	287	1109	16280	proteinaceous extracellular matrix	P07355|P01033|P12110|P14543|P27797|P55268|O75718|P09238|P29400|P09237|P21810|P12107|P01137|P13611
31225	0.94184	0.98196	5	128	1109	16280	anchored to membrane	P06731|P13987|P00450|P08174|P14384
31012	0.9427	0.98196	14	294	1109	16280	extracellular matrix	P07355|P01033|P12110|P14543|P27797|P55268|O75718|P09238|P29400|P09237|P21810|P12107|P01137|P13611
5615	0.94416	0.98196	24	467	1109	16280	extracellular space	P28799|P02671|O00214|P24001|P02675|Q14627|P27797|P09601|P11597|P17936|P09238|P09237|Q14005|O14791|Q15782|P09543|P18428|P10124|P00450|P00533|Q92743|P05161|P01137|P20062
43005	0.94434	0.98196	3	88	1109	16280	neuron projection	O60313|Q9UBB4|P01137
45211	0.96214	0.99838	4	117	1109	16280	postsynaptic membrane	O43164|P32297|Q8NF91|P30532
44456	0.97905	1	4	129	1109	16280	synapse part	O43164|P32297|Q8NF91|P30532
45111	0.98641	1	6	181	1109	16280	intermediate filament cytoskeleton	P02545|P30622|P08727|P08670|P14136|P05783
5882	0.98641	1	6	181	1109	16280	intermediate filament	P02545|P30622|P08727|P08670|P14136|P05783
45095	0.98916	1	1	64	1109	16280	keratin filament	P05783
44421	0.99455	1	34	729	1109	16280	extracellular region part	P07355|P01033|Q14627|P27797|P09601|P29400|P17936|O14791|Q15782|P18428|P00450|Q92743|P05161|P20062|P28799|P02671|P12110|P24001|O00214|P14543|P02675|P11597|P55268|O75718|P09238|P09237|Q14005|P09543|P10124|P21810|P12107|P00533|P13611|P01137
45202	0.99639	1	7	231	1109	16280	synapse	O43164|P32297|Q8NF91|P23443|P30532|Q9Y6N9|Q96F07
44459	0.99706	1	93	1749	1109	16280	plasma membrane part	O15427|P31785|P55061|Q15654|Q14289|P02686|P20036|P41240|P35221|Q96G91|P63010|Q92673|Q14332|P61769|O15498|P32297|P15311|Q16625|P08034|P37088|O60449|Q8NI35|P51572|P08174|P05023|P05026|Q12864|P06340|P04083|O15121|Q9Y6R1|Q9Y490|P30532|Q68CZ2|Q8N307|P26038|P17181|O00560|P05107|P35579|P01903|Q16186|P01906|O14817|Q00325|Q2M1Z3|Q9HBL0|Q96CW1|P15509|Q99439|P14209|P18206|P23443|Q14444|P08581|P27797|Q9UBD6|…
30136	0.99737	1	1	84	1109	16280	clathrin-coated vesicle	Q00610
31226	0.99987	1	51	1161	1109	16280	intrinsic to plasma membrane	O15427|P31785|P55061|P20036|Q96G91|Q92673|Q14332|O15498|P32297|O60449|P51572|P08174|P05023|P05026|O15121|Q9Y6R1|P30532|P17181|O00560|P05107|P01903|Q16186|P01906|O14817|Q00325|P15509|P14209|Q14444|P08581|Q9UBD6|O00270|O96005|Q14643|Q14168|P14770|P35232|P06756|P11836|P00450|O15438|P01833|P52272|P49279|P15941|P06731|Q99650|O95864|P31431|O14836|P23229|Q07837
5887	0.99988	1	50	1145	1109	16280	integral to plasma membrane	O15427|P31785|P55061|P20036|Q96G91|Q92673|Q14332|O15498|P32297|O60449|P51572|P08174|P05023|P05026|O15121|Q9Y6R1|P30532|P17181|O00560|P05107|P01903|Q16186|P01906|O14817|Q00325|P15509|P14209|Q14444|P08581|Q9UBD6|O00270|O96005|Q14643|Q14168|P14770|P35232|P06756|P11836|O15438|P01833|P52272|P49279|P15941|P06731|Q99650|O95864|P31431|O14836|P23229|Q07837
5886	1	1	161	3237	1109	16280	plasma membrane	O15427|P46940|P40967|Q01082|P13987|Q9UHD8|Q9Y5E9|Q15654|Q14289|P20036|Q96NY7|P41240|Q92673|O43491|Q14332|P61769|O15498|P32297|Q16625|Q13283|P08034|Q13564|P08174|P15056|P04083|O15121|Q9Y6R1|Q9Y490|P30532|Q8N307|O00560|P01903|O00299|P01906|Q96AD5|O75563|P07237|Q13291|Q86UX7|O60486|Q99439|Q8IZF2|P18206|P60953|Q14444|Q9UDY2|Q96F07|O00270|Q9NZN4|Q14643|P35222|Q14168|P43355|Q02223|P35232|P06756|P11836|…
16020	1	1	372	6965	1109	16280	membrane	P46940|Q8WUH6|P13987|Q9ULG6|O75964|Q9NYL4|Q9Y5E9|Q8N5H7|P20036|Q6PIU2|P41240|Q92673|O43491|O14791|Q14332|P61769|Q9BSJ8|O15498|Q9Y696|P49792|P52789|P49790|O75694|Q9NS40|Q13564|Q7Z7H5|Q5JPE7|Q8N307|Q07820|Q86YC3|O75369|Q4KMQ2|Q9P2E5|Q9NZJ7|P01903|Q9H3K2|P01906|Q07812|Q13454|P07237|O75563|O60313|Q86YR5|P06276|O43570|Q8IZF2|Q99439|O95248|P18206|Q6TCH4|Q14444|P27930|P09669|P35606|Q9UDY2|Q96F07|P04040|…
5576	1	1	62	1914	1109	16280	extracellular region	P07355|P40967|P13987|P01033|P60022|Q9BX93|Q14627|P09601|P29400|P61769|O14791|P18428|P01024|P55058|P28799|P01042|P24001|O00214|P14543|P02675|Q8N307|Q9BTY2|O75718|P11597|Q9BXJ4|Q8WU39|P10124|P07237|P06276|Q8TB96|P01137|P13611|P15509|P27797|P07711|Q9HC84|P61916|P17936|P40222|Q15782|P04626|P00450|Q92743|P05161|P01833|P20062|O95236|P02671|P12110|Q99541|P15941|P55268|P09238|P09237|Q14005|P06396|O75398|…
44425	1	1	287	5909	1109	16280	membrane part	Q8WUH6|P13987|Q9ULG6|O75964|Q9NYL4|Q9Y5E9|P20036|Q6PIU2|P41240|Q92673|O43491|O14791|Q14332|P61769|Q9BSJ8|O15498|P49792|P49790|O75694|Q9NS40|Q7Z7H5|Q5JPE7|Q8N307|Q07820|Q86YC3|O75369|Q4KMQ2|Q9NZJ7|Q9P2E5|P01903|Q9H3K2|P01906|Q07812|Q13454|O60313|Q86YR5|O43570|Q8IZF2|Q99439|O95248|P18206|Q6TCH4|Q14444|P09669|P27930|P35606|Q9UDY2|Q96F07|Q9Y678|P06756|P14625|O75787|Q9Y6G1|O75881|P35610|P27824|Q9NTG1|…
16021	1	1	211	5211	1109	16280	integral to membrane	Q8WUH6|Q9ULG6|Q9Y5E9|Q9NYL4|P20036|Q6PIU2|Q92673|Q14332|Q9BSJ8|O15498|P49792|O75694|P49790|Q9NS40|Q7Z7H5|Q5JPE7|Q07820|Q86YC3|O75369|Q4KMQ2|Q9NZJ7|Q9P2E5|P01903|Q9H3K2|P01906|Q07812|Q13454|O60313|O43570|Q8IZF2|O95248|Q6TCH4|Q14444|P09669|P27930|P06756|O75787|Q9Y6G1|P27824|P35610|Q9NTG1|P35613|P20023|P49279|Q9H3H5|Q9NY97|Q5SRE5|Q99650|P48201|Q9P2P1|Q8NF37|P00533|Q9BUN8|Q9BVK6|Q8N6L1|Q96G91|Q9NYP7|…
31224	1	1	215	5314	1109	16280	intrinsic to membrane	Q8WUH6|P13987|Q9ULG6|Q9Y5E9|Q9NYL4|P20036|Q6PIU2|Q92673|Q14332|O14791|Q9BSJ8|O15498|P49792|O75694|P49790|Q9NS40|Q7Z7H5|Q5JPE7|Q07820|Q86YC3|O75369|Q4KMQ2|Q9NZJ7|Q9P2E5|P01903|Q9H3K2|P01906|Q07812|Q13454|O60313|O43570|Q8IZF2|O95248|Q6TCH4|Q14444|P09669|P27930|P06756|O75787|Q9Y6G1|P27824|P35610|Q9NTG1|P35613|P20023|P49279|Q9H3H5|Q9NY97|Q5SRE5|Q99650|P48201|Q9P2P1|Q8NF37|P00533|Q9BUN8|Q9BVK6|Q8N6L1|…
